# Supplementary material for: Metabolite profile of COVID-19 revealed by UPLC-MS/MS-based widely targeted metabolomics
Source: Front Immunol. 2022 Jul 18;13:894170. doi: 10.3389/fimmu.2022.894170 (PMC9339702; doi:10.3389/fimmu.2022.894170)
Supplement: Supplementary file 4 [file DataSheet_1.xlsx]

## Sheet: Table1
#Kegg_pathway	ko_ID	Unique compound	compound	Uni_all	compound_all	cpd_ID
Cysteine and methionine metabolism	ko00270	3	16	41	251	C00170+C00491+C00051
Metabolic pathways	ko01100	35	211	41	251	C05512+C00219+C11516+C01921+C05634+C00385+C00362+C00245+C01157+C00026+C05963+C00491+C00581+C04282+C14772+C06730+C00416+C13636+C00153+C00051+C07130+C00755+C01367+C00170+C07480+C00020+C01879+C00431+C00822+C00813+C00025+C00186+C00380+C00346+C01586
ABC transporters	ko02010	6	41	41	251	C00245+C05512+C01157+C00025+C00051+C00491
Ferroptosis	ko04216	4	7	41	251	C00051+C00491+C00025+C00219
Protein digestion and absorption	ko04974	2	22	41	251	C00025+C00491
Arginine biosynthesis	ko00220	2	10	41	251	C00026+C00025
Alanine, aspartate and glutamate metabolism	ko00250	2	12	41	251	C00025+C00026
Arginine and proline metabolism	ko00330	5	18	41	251	C04282+C01157+C00025+C00581+C00431
Histidine metabolism	ko00340	2	9	41	251	C00025+C00026
Taurine and hypotaurine metabolism	ko00430	3	6	41	251	C00025+C00026+C00245
D-Glutamine and D-glutamate metabolism	ko00471	2	3	41	251	C00026+C00025
Glutathione metabolism	ko00480	3	12	41	251	C01879+C00025+C00051
Neomycin, kanamycin and gentamicin biosynthesis	ko00524	1	2	41	251	C00025
Glyoxylate and dicarboxylate metabolism	ko00630	2	9	41	251	C00026+C00025
Butanoate metabolism	ko00650	2	7	41	251	C00026+C00025
Porphyrin and chlorophyll metabolism	ko00860	1	9	41	251	C00025
Nitrogen metabolism	ko00910	1	3	41	251	C00025
Aminoacyl-tRNA biosynthesis	ko00970	1	20	41	251	C00025
Carbon metabolism	ko01200	2	15	41	251	C00025+C00026
2-Oxocarboxylic acid metabolism	ko01210	2	15	41	251	C00026+C00025
Biosynthesis of amino acids	ko01230	2	36	41	251	C00025+C00026
Biosynthesis of cofactors	ko01240	5	42	41	251	C00051+C00153+C00020+C00026+C00025
FoxO signaling pathway	ko04068	2	3	41	251	C00020+C00025
Phospholipase D signaling pathway	ko04072	2	2	41	251	C00025+C00416
Neuroactive ligand-receptor interaction	ko04080	2	14	41	251	C00025+C00245
Gap junction	ko04540	1	2	41	251	C00025
Circadian entrainment	ko04713	1	1	41	251	C00025
Long-term potentiation	ko04720	1	1	41	251	C00025
Synaptic vesicle cycle	ko04721	1	4	41	251	C00025
Retrograde endocannabinoid signaling	ko04723	2	2	41	251	C00025+C00219
Glutamatergic synapse	ko04724	1	2	41	251	C00025
GABAergic synapse	ko04727	2	4	41	251	C00026+C00025
Long-term depression	ko04730	2	2	41	251	C00025+C00219
Taste transduction	ko04742	2	6	41	251	C00020+C00025
Proximal tubule bicarbonate reclamation	ko04964	2	5	41	251	C00026+C00025
Amyotrophic lateral sclerosis	ko05014	1	2	41	251	C00025
Huntington disease	ko05016	1	1	41	251	C00025
Spinocerebellar ataxia	ko05017	1	1	41	251	C00025
Pathways of neurodegeneration - multiple diseases	ko05022	2	4	41	251	C00020+C00025
Cocaine addiction	ko05030	1	2	41	251	C00025
Amphetamine addiction	ko05031	1	2	41	251	C00025
Nicotine addiction	ko05033	1	2	41	251	C00025
Alcoholism	ko05034	1	3	41	251	C00025
Central carbon metabolism in cancer	ko05230	3	24	41	251	C00026+C00186+C00025
Primary bile acid biosynthesis	ko00120	2	4	41	251	C00245+C01921
Bile secretion	ko04976	5	15	41	251	C00026+C01921+C00051+C05963+C06804
Cholesterol metabolism	ko04979	1	2	41	251	C01921
Purine metabolism	ko00230	5	15	41	251	C05512+C00385+C00020+C00362+C01367
Caffeine metabolism	ko00232	3	9	41	251	C07130+C07480+C00385
Antifolate resistance	ko01523	1	3	41	251	C00020
cGMP-PKG signaling pathway	ko04022	1	2	41	251	C00020
cAMP signaling pathway	ko04024	3	9	41	251	C00020+C00186+C00416
mTOR signaling pathway	ko04150	1	2	41	251	C00020
PI3K-Akt signaling pathway	ko04151	1	1	41	251	C00020
AMPK signaling pathway	ko04152	1	3	41	251	C00020
Longevity regulating pathway	ko04211	1	1	41	251	C00020
Olfactory transduction	ko04740	1	1	41	251	C00020
Regulation of lipolysis in adipocytes	ko04923	2	5	41	251	C00020+C00219
Renin secretion	ko04924	1	4	41	251	C00020
Aldosterone synthesis and secretion	ko04925	2	4	41	251	C00020+C00219
Cortisol synthesis and secretion	ko04927	1	2	41	251	C00020
Parathyroid hormone synthesis, secretion and action	ko04928	1	2	41	251	C00020
Cushing syndrome	ko04934	1	2	41	251	C00020
Parkinson disease	ko05012	1	3	41	251	C00020
Morphine addiction	ko05032	1	2	41	251	C00020
Citrate cycle (TCA cycle)	ko00020	1	5	41	251	C00026
Pentose and glucuronate interconversions	ko00040	1	4	41	251	C00026
Ascorbate and aldarate metabolism	ko00053	1	5	41	251	C00026
Lysine degradation	ko00310	2	10	41	251	C00026+C00431
HIF-1 signaling pathway	ko04066	2	5	41	251	C00186+C00026
Glucagon signaling pathway	ko04922	2	7	41	251	C00026+C00186
Sulfur metabolism	ko00920	1	8	41	251	C00245
Glycolysis / Gluconeogenesis	ko00010	1	5	41	251	C00186
Fructose and mannose metabolism	ko00051	2	5	41	251	C11516+C00186
Pyruvate metabolism	ko00620	1	5	41	251	C00186
Propanoate metabolism	ko00640	1	6	41	251	C00186
Arachidonic acid metabolism	ko00590	4	5	41	251	C05963+C04577+C00219+C14772
Serotonergic synapse	ko04726	3	4	41	251	C05963+C00219+C14772
Glycosylphosphatidylinositol (GPI)-anchor biosynthesis	ko00563	1	1	41	251	C00346
Glycerophospholipid metabolism	ko00564	3	7	41	251	C00670+C00416+C00346
Sphingolipid metabolism	ko00600	1	2	41	251	C00346
Sphingolipid signaling pathway	ko04071	1	3	41	251	C00346
Glycerolipid metabolism	ko00561	1	1	41	251	C00416
Phosphatidylinositol signaling system	ko04070	1	2	41	251	C00416
Fc gamma R-mediated phagocytosis	ko04666	2	2	41	251	C00219+C00416
GnRH signaling pathway	ko04912	2	2	41	251	C00219+C00416
Fat digestion and absorption	ko04975	1	1	41	251	C00416
Pathways in cancer	ko05200	1	2	41	251	C00416
Pancreatic cancer	ko05212	1	1	41	251	C00416
Choline metabolism in cancer	ko05231	2	4	41	251	C00670+C00416
Linoleic acid metabolism	ko00591	2	8	41	251	C00219+C14766
Biosynthesis of unsaturated fatty acids	ko01040	1	9	41	251	C00219
Necroptosis	ko04217	1	1	41	251	C00219
Vascular smooth muscle contraction	ko04270	1	3	41	251	C00219
Platelet activation	ko04611	1	1	41	251	C00219
Fc epsilon RI signaling pathway	ko04664	1	2	41	251	C00219
Inflammatory mediator regulation of TRP channels	ko04750	1	1	41	251	C00219
Ovarian steroidogenesis	ko04913	1	1	41	251	C00219
Oxytocin signaling pathway	ko04921	1	1	41	251	C00219
Leishmaniasis	ko05140	1	1	41	251	C00219
Amoebiasis	ko05146	1	2	41	251	C00219
Tryptophan metabolism	ko00380	1	14	41	251	C05634
Thyroid hormone synthesis	ko04918	1	5	41	251	C00051
Diabetic cardiomyopathy	ko05415	1	7	41	251	C00051
Pyrimidine metabolism	ko00240	2	19	41	251	C00380+C00813
Nicotinate and nicotinamide metabolism	ko00760	2	11	41	251	C00153+C01004
Vitamin digestion and absorption	ko04977	1	5	41	251	C00153
Glycine, serine and threonine metabolism	ko00260	1	16	41	251	C00581
Phenylalanine metabolism	ko00360	1	16	41	251	C01586
Ether lipid metabolism	ko00565	1	1	41	251	C00670
Drug metabolism - other enzymes	ko00983	1	3	41	251	C07446
Tyrosine metabolism	ko00350	1	15	41	251	C00822

## Sheet: Table2
#Kegg_pathway	ko_id	Cluter_frequency	Genome_frequency	P-value	FDR
Arachidonic acid metabolism	ko00590	4 out of 41 9.75609756097561%	5 out of 251 1.99203187250996%	0.00276032	0.309156
Serotonergic synapse	ko04726	3 out of 41 7.31707317073171%	4 out of 251 1.59362549800797%	0.0144923	1
Ferroptosis	ko04216	4 out of 41 9.75609756097561%	7 out of 251 2.78884462151394%	0.0149838	1
Phospholipase D signaling pathway	ko04072	2 out of 41 4.8780487804878%	2 out of 251 0.796812749003984%	0.0261355	1
Retrograde endocannabinoid signaling	ko04723	2 out of 41 4.8780487804878%	2 out of 251 0.796812749003984%	0.0261355	1
GnRH signaling pathway	ko04912	2 out of 41 4.8780487804878%	2 out of 251 0.796812749003984%	0.0261355	1
Fc gamma R-mediated phagocytosis	ko04666	2 out of 41 4.8780487804878%	2 out of 251 0.796812749003984%	0.0261355	1
Long-term depression	ko04730	2 out of 41 4.8780487804878%	2 out of 251 0.796812749003984%	0.0261355	1
Taurine and hypotaurine metabolism	ko00430	3 out of 41 7.31707317073171%	6 out of 251 2.39043824701195%	0.0568897	1
FoxO signaling pathway	ko04068	2 out of 41 4.8780487804878%	3 out of 251 1.19521912350598%	0.0702194	1
D-Glutamine and D-glutamate metabolism	ko00471	2 out of 41 4.8780487804878%	3 out of 251 1.19521912350598%	0.0702194	1
Bile secretion	ko04976	5 out of 41 12.1951219512195%	15 out of 251 5.97609561752988%	0.0773513	1
Purine metabolism	ko00230	5 out of 41 12.1951219512195%	15 out of 251 5.97609561752988%	0.0773513	1
Glycerophospholipid metabolism	ko00564	3 out of 41 7.31707317073171%	7 out of 251 2.78884462151394%	0.0883191	1
GABAergic synapse	ko04727	2 out of 41 4.8780487804878%	4 out of 251 1.59362549800797%	0.125946	1
Pathways of neurodegeneration - multiple diseases	ko05022	2 out of 41 4.8780487804878%	4 out of 251 1.59362549800797%	0.125946	1
Aldosterone synthesis and secretion	ko04925	2 out of 41 4.8780487804878%	4 out of 251 1.59362549800797%	0.125946	1
Primary bile acid biosynthesis	ko00120	2 out of 41 4.8780487804878%	4 out of 251 1.59362549800797%	0.125946	1
Choline metabolism in cancer	ko05231	2 out of 41 4.8780487804878%	4 out of 251 1.59362549800797%	0.125946	1
Arginine and proline metabolism	ko00330	5 out of 41 12.1951219512195%	18 out of 251 7.17131474103586%	0.150419	1
Leishmaniasis	ko05140	1 out of 41 2.4390243902439%	1 out of 251 0.398406374501992%	0.163347	1
Longevity regulating pathway	ko04211	1 out of 41 2.4390243902439%	1 out of 251 0.398406374501992%	0.163347	1
Spinocerebellar ataxia	ko05017	1 out of 41 2.4390243902439%	1 out of 251 0.398406374501992%	0.163347	1
Glycerolipid metabolism	ko00561	1 out of 41 2.4390243902439%	1 out of 251 0.398406374501992%	0.163347	1
Ether lipid metabolism	ko00565	1 out of 41 2.4390243902439%	1 out of 251 0.398406374501992%	0.163347	1
Fat digestion and absorption	ko04975	1 out of 41 2.4390243902439%	1 out of 251 0.398406374501992%	0.163347	1
Inflammatory mediator regulation of TRP channels	ko04750	1 out of 41 2.4390243902439%	1 out of 251 0.398406374501992%	0.163347	1
Olfactory transduction	ko04740	1 out of 41 2.4390243902439%	1 out of 251 0.398406374501992%	0.163347	1
Ovarian steroidogenesis	ko04913	1 out of 41 2.4390243902439%	1 out of 251 0.398406374501992%	0.163347	1
Circadian entrainment	ko04713	1 out of 41 2.4390243902439%	1 out of 251 0.398406374501992%	0.163347	1
Platelet activation	ko04611	1 out of 41 2.4390243902439%	1 out of 251 0.398406374501992%	0.163347	1
Pancreatic cancer	ko05212	1 out of 41 2.4390243902439%	1 out of 251 0.398406374501992%	0.163347	1
Huntington disease	ko05016	1 out of 41 2.4390243902439%	1 out of 251 0.398406374501992%	0.163347	1
Oxytocin signaling pathway	ko04921	1 out of 41 2.4390243902439%	1 out of 251 0.398406374501992%	0.163347	1
Necroptosis	ko04217	1 out of 41 2.4390243902439%	1 out of 251 0.398406374501992%	0.163347	1
Long-term potentiation	ko04720	1 out of 41 2.4390243902439%	1 out of 251 0.398406374501992%	0.163347	1
Glycosylphosphatidylinositol (GPI)-anchor biosynthesis	ko00563	1 out of 41 2.4390243902439%	1 out of 251 0.398406374501992%	0.163347	1
PI3K-Akt signaling pathway	ko04151	1 out of 41 2.4390243902439%	1 out of 251 0.398406374501992%	0.163347	1
cAMP signaling pathway	ko04024	3 out of 41 7.31707317073171%	9 out of 251 3.58565737051793%	0.167253	1
Caffeine metabolism	ko00232	3 out of 41 7.31707317073171%	9 out of 251 3.58565737051793%	0.167253	1
Fructose and mannose metabolism	ko00051	2 out of 41 4.8780487804878%	5 out of 251 1.99203187250996%	0.188517	1
Regulation of lipolysis in adipocytes	ko04923	2 out of 41 4.8780487804878%	5 out of 251 1.99203187250996%	0.188517	1
HIF-1 signaling pathway	ko04066	2 out of 41 4.8780487804878%	5 out of 251 1.99203187250996%	0.188517	1
Proximal tubule bicarbonate reclamation	ko04964	2 out of 41 4.8780487804878%	5 out of 251 1.99203187250996%	0.188517	1
Taste transduction	ko04742	2 out of 41 4.8780487804878%	6 out of 251 2.39043824701195%	0.254331	1
Glutamatergic synapse	ko04724	1 out of 41 2.4390243902439%	2 out of 251 0.796812749003984%	0.300558	1
Parathyroid hormone synthesis, secretion and action	ko04928	1 out of 41 2.4390243902439%	2 out of 251 0.796812749003984%	0.300558	1
Pathways in cancer	ko05200	1 out of 41 2.4390243902439%	2 out of 251 0.796812749003984%	0.300558	1
Phosphatidylinositol signaling system	ko04070	1 out of 41 2.4390243902439%	2 out of 251 0.796812749003984%	0.300558	1
Amphetamine addiction	ko05031	1 out of 41 2.4390243902439%	2 out of 251 0.796812749003984%	0.300558	1
Fc epsilon RI signaling pathway	ko04664	1 out of 41 2.4390243902439%	2 out of 251 0.796812749003984%	0.300558	1
Nicotine addiction	ko05033	1 out of 41 2.4390243902439%	2 out of 251 0.796812749003984%	0.300558	1
Cushing syndrome	ko04934	1 out of 41 2.4390243902439%	2 out of 251 0.796812749003984%	0.300558	1
Cocaine addiction	ko05030	1 out of 41 2.4390243902439%	2 out of 251 0.796812749003984%	0.300558	1
Neomycin, kanamycin and gentamicin biosynthesis	ko00524	1 out of 41 2.4390243902439%	2 out of 251 0.796812749003984%	0.300558	1
Sphingolipid metabolism	ko00600	1 out of 41 2.4390243902439%	2 out of 251 0.796812749003984%	0.300558	1
Morphine addiction	ko05032	1 out of 41 2.4390243902439%	2 out of 251 0.796812749003984%	0.300558	1
Gap junction	ko04540	1 out of 41 2.4390243902439%	2 out of 251 0.796812749003984%	0.300558	1
mTOR signaling pathway	ko04150	1 out of 41 2.4390243902439%	2 out of 251 0.796812749003984%	0.300558	1
Cholesterol metabolism	ko04979	1 out of 41 2.4390243902439%	2 out of 251 0.796812749003984%	0.300558	1
Amoebiasis	ko05146	1 out of 41 2.4390243902439%	2 out of 251 0.796812749003984%	0.300558	1
Cortisol synthesis and secretion	ko04927	1 out of 41 2.4390243902439%	2 out of 251 0.796812749003984%	0.300558	1
Amyotrophic lateral sclerosis	ko05014	1 out of 41 2.4390243902439%	2 out of 251 0.796812749003984%	0.300558	1
cGMP-PKG signaling pathway	ko04022	1 out of 41 2.4390243902439%	2 out of 251 0.796812749003984%	0.300558	1
Glutathione metabolism	ko00480	3 out of 41 7.31707317073171%	12 out of 251 4.7808764940239%	0.309279	1
Butanoate metabolism	ko00650	2 out of 41 4.8780487804878%	7 out of 251 2.78884462151394%	0.320735	1
Glucagon signaling pathway	ko04922	2 out of 41 4.8780487804878%	7 out of 251 2.78884462151394%	0.320735	1
Linoleic acid metabolism	ko00591	2 out of 41 4.8780487804878%	8 out of 251 3.18725099601594%	0.385825	1
Drug metabolism - other enzymes	ko00983	1 out of 41 2.4390243902439%	3 out of 251 1.19521912350598%	0.415727	1
Antifolate resistance	ko01523	1 out of 41 2.4390243902439%	3 out of 251 1.19521912350598%	0.415727	1
Alcoholism	ko05034	1 out of 41 2.4390243902439%	3 out of 251 1.19521912350598%	0.415727	1
Sphingolipid signaling pathway	ko04071	1 out of 41 2.4390243902439%	3 out of 251 1.19521912350598%	0.415727	1
AMPK signaling pathway	ko04152	1 out of 41 2.4390243902439%	3 out of 251 1.19521912350598%	0.415727	1
Parkinson disease	ko05012	1 out of 41 2.4390243902439%	3 out of 251 1.19521912350598%	0.415727	1
Vascular smooth muscle contraction	ko04270	1 out of 41 2.4390243902439%	3 out of 251 1.19521912350598%	0.415727	1
Nitrogen metabolism	ko00910	1 out of 41 2.4390243902439%	3 out of 251 1.19521912350598%	0.415727	1
Glyoxylate and dicarboxylate metabolism	ko00630	2 out of 41 4.8780487804878%	9 out of 251 3.58565737051793%	0.448274	1
Histidine metabolism	ko00340	2 out of 41 4.8780487804878%	9 out of 251 3.58565737051793%	0.448274	1
Cysteine and methionine metabolism	ko00270	3 out of 41 7.31707317073171%	16 out of 251 6.37450199203187%	0.502733	1
Arginine biosynthesis	ko00220	2 out of 41 4.8780487804878%	10 out of 251 3.98406374501992%	0.507207	1
Lysine degradation	ko00310	2 out of 41 4.8780487804878%	10 out of 251 3.98406374501992%	0.507207	1
Metabolic pathways	ko01100	35 out of 41 85.3658536585366%	211 out of 251 84.0637450199203%	0.508279	1
Renin secretion	ko04924	1 out of 41 2.4390243902439%	4 out of 251 1.59362549800797%	0.51232	1
Pentose and glucuronate interconversions	ko00040	1 out of 41 2.4390243902439%	4 out of 251 1.59362549800797%	0.51232	1
Synaptic vesicle cycle	ko04721	1 out of 41 2.4390243902439%	4 out of 251 1.59362549800797%	0.51232	1
Nicotinate and nicotinamide metabolism	ko00760	2 out of 41 4.8780487804878%	11 out of 251 4.38247011952191%	0.562091	1
Ascorbate and aldarate metabolism	ko00053	1 out of 41 2.4390243902439%	5 out of 251 1.99203187250996%	0.593271	1
Pyruvate metabolism	ko00620	1 out of 41 2.4390243902439%	5 out of 251 1.99203187250996%	0.593271	1
Glycolysis / Gluconeogenesis	ko00010	1 out of 41 2.4390243902439%	5 out of 251 1.99203187250996%	0.593271	1
Vitamin digestion and absorption	ko04977	1 out of 41 2.4390243902439%	5 out of 251 1.99203187250996%	0.593271	1
Citrate cycle (TCA cycle)	ko00020	1 out of 41 2.4390243902439%	5 out of 251 1.99203187250996%	0.593271	1
Thyroid hormone synthesis	ko04918	1 out of 41 2.4390243902439%	5 out of 251 1.99203187250996%	0.593271	1
Alanine, aspartate and glutamate metabolism	ko00250	2 out of 41 4.8780487804878%	12 out of 251 4.7808764940239%	0.612654	1
Propanoate metabolism	ko00640	1 out of 41 2.4390243902439%	6 out of 251 2.39043824701195%	0.661059	1
Neuroactive ligand-receptor interaction	ko04080	2 out of 41 4.8780487804878%	14 out of 251 5.57768924302789%	0.700623	1
ABC transporters	ko02010	6 out of 41 14.6341463414634%	41 out of 251 16.3346613545817%	0.700709	1
Diabetic cardiomyopathy	ko05415	1 out of 41 2.4390243902439%	7 out of 251 2.78884462151394%	0.71778	1
Carbon metabolism	ko01200	2 out of 41 4.8780487804878%	15 out of 251 5.97609561752988%	0.73824	1
2-Oxocarboxylic acid metabolism	ko01210	2 out of 41 4.8780487804878%	15 out of 251 5.97609561752988%	0.73824	1
Sulfur metabolism	ko00920	1 out of 41 2.4390243902439%	8 out of 251 3.18725099601594%	0.765202	1
Central carbon metabolism in cancer	ko05230	3 out of 41 7.31707317073171%	24 out of 251 9.56175298804781%	0.789714	1
Porphyrin and chlorophyll metabolism	ko00860	1 out of 41 2.4390243902439%	9 out of 251 3.58565737051793%	0.804818	1
Biosynthesis of unsaturated fatty acids	ko01040	1 out of 41 2.4390243902439%	9 out of 251 3.58565737051793%	0.804818	1
Pyrimidine metabolism	ko00240	2 out of 41 4.8780487804878%	19 out of 251 7.56972111553785%	0.85168	1
Biosynthesis of cofactors	ko01240	5 out of 41 12.1951219512195%	42 out of 251 16.7330677290837%	0.861663	1
Protein digestion and absorption	ko04974	2 out of 41 4.8780487804878%	22 out of 251 8.76494023904382%	0.905797	1
Tryptophan metabolism	ko00380	1 out of 41 2.4390243902439%	14 out of 251 5.57768924302789%	0.923505	1
Tyrosine metabolism	ko00350	1 out of 41 2.4390243902439%	15 out of 251 5.97609561752988%	0.936739	1
Phenylalanine metabolism	ko00360	1 out of 41 2.4390243902439%	16 out of 251 6.37450199203187%	0.947729	1
Glycine, serine and threonine metabolism	ko00260	1 out of 41 2.4390243902439%	16 out of 251 6.37450199203187%	0.947729	1
Aminoacyl-tRNA biosynthesis	ko00970	1 out of 41 2.4390243902439%	20 out of 251 7.96812749003984%	0.975855	1
Biosynthesis of amino acids	ko01230	2 out of 41 4.8780487804878%	36 out of 251 14.3426294820717%	0.991117	1

## Sheet: Table3
name	Total Cmpd	Hits	Pvalue	FDR	foldEnrichment	hitCompound	member	reference
Taurine and hypotaurine metabolism	8	2	9.0974e-11	2.1446e-09	31.4824	L-Cysteine,Taurine	L-Cysteate; L-Cysteine; Cysteamine; 3-Sulfino-L-alanine; Taurine; Hypotaurine; 5-L-Glutamyl-taurine; Taurocholate	http://www.genome.jp/kegg-bin/show_pathway?hsa00430
Primary bile acid biosynthesis	46	2	9.3245e-11	2.1446e-09	33.5623	Glycine,Taurine	Cholesterol; Cholest-5-ene-3beta,26-diol; 25-Hydroxycholesterol; 4-Cholesten-7alpha,12alpha-diol-3-one; 7alpha-Hydroxycholest-4-en-3-one; 7alpha,12alpha-Dihydroxy-5beta-cholestan-3-one; 3alpha,7alpha,12alpha-Trihydroxy-5beta-cholestane; (25R)-3alpha,7alpha,12alpha-Trihydroxy-5beta-cholestan-26-oyl-CoA; (25S)-3alpha,7alpha,12alpha-Trihydroxy-5beta-cholestan-26-oyl-CoA; 7alpha-Hydroxy-5beta-cholest…	http://www.genome.jp/kegg-bin/show_pathway?hsa00120
Drug metabolism - other enzymes	39	1	3.3137e-08	5.081e-07	26.0144	Isonicotinic acid	Mercaptopurine (INN); 6-Thioinosine-5'-monophosphate; 6-Thioguanosine monophosphate; 6-Methylmercaptopurine; Tioguanine (INN); 6-Thioxanthine 5'-monophosphate; 6-Mercaptopurine ribonucleoside triphosphate; Isoniazid (JP17/USP/INN); Acetylhydrazine; Fluorouracil (JP17/USP/INN); 5,6-Dihydro-5-fluorouracil; alpha-Fluoro-beta-ureidopropionic acid; 5-Fluorouridine; Floxuridine (USP/INN); Tegafur (JP17…	http://www.genome.jp/kegg-bin/show_pathway?hsa00983
Phenylalanine metabolism	10	2	5.2723e-07	4.8505e-06	18.3238	L-Phenylalanine,L-Tyrosine	Phenylacetaldehyde; L-Phenylalanine; Phenethylamine; Phenylpyruvate; Benzoyl-CoA; Phenylacetic acid; 2-Hydroxyphenylacetate; 2-Hydroxy-3-phenylpropenoate; Hippurate; L-Tyrosine	http://www.genome.jp/kegg-bin/show_pathway?hsa00360
Phenylalanine, tyrosine and tryptophan biosynthesis	4	2	5.2723e-07	4.8505e-06	18.3238	L-Phenylalanine,L-Tyrosine	Phenylpyruvate; L-Phenylalanine; L-Tyrosine; 3-(4-Hydroxyphenyl)pyruvate	http://www.genome.jp/kegg-bin/show_pathway?hsa00400
Ubiquinone and other terpenoid-quinone biosynthesis	9	1	9.9822e-05	0.00066079	14.0935	L-Tyrosine	3-(4-Hydroxyphenyl)pyruvate; L-Tyrosine; Menaquinone; 2,3-Epoxymenaquinone; Phylloquinol; Phylloquinone; Menaquinol; Vitamin K1 epoxide; Homogentisate	http://www.genome.jp/kegg-bin/show_pathway?hsa00130
Tyrosine metabolism	42	3	0.00010055	0.00066079	14.0289	L-Tyrosine,Dopaquinone,Thyroxine	L-Dopachrome; L-Normetanephrine; 3-Methoxy-4-hydroxyphenylglycolaldehyde; L-Noradrenaline; L-Adrenaline; 3,4-Dihydroxymandelate; 3,4-Dihydroxymandelaldehyde; 3,4-Dihydroxyphenylethyleneglycol; L-Metanephrine; Dopamine; 3,4-Dihydroxyphenylacetaldehyde; 3,4-Dihydroxyphenylacetate; 3-Methoxy-4-hydroxyphenylacetaldehyde; 3-Methoxytyramine; 3,4-Dihydroxy-L-phenylalanine; 3,5-Diiodo-L-tyrosine; 3-Iodo-…	http://www.genome.jp/kegg-bin/show_pathway?hsa00350
Glycerophospholipid metabolism	36	2	0.0021077	0.012119	8.31364	Choline,Acetylcholine	Phosphatidylethanolamine; Phosphatidylcholine; Glycerone phosphate; 1-Acyl-sn-glycero-3-phosphocholine; CDP-choline; 1,2-Diacyl-sn-glycerol; Choline phosphate; Choline; Acetylcholine; Ethanolamine phosphate; Ethanolamine; Phosphatidate; Phosphatidylserine; 1-Acyl-sn-glycerol 3-phosphate; CDP-diacylglycerol; sn-Glycerol 3-phosphate; sn-Glycero-3-phosphocholine; CDP-ethanolamine; 1-Acyl-sn-glycero-…	http://www.genome.jp/kegg-bin/show_pathway?hsa00564
Aminoacyl-tRNA biosynthesis	48	16	0.0070903	0.036239	4.88678	L-Histidine,L-Phenylalanine,L-Arginine,L-Glutamine,L-Cysteine,Glycine,L-Serine,L-Methionine,L-Valine,L-Alanine,L-Lysine,L-Isoleucine,L-Threonine,L-Tryptophan,L-Tyrosine,L-Proline	L-Asparagine; L-Histidine; L-Phenylalanine; L-Arginine; L-Glutamine; L-Cysteine; Glycine; L-Aspartate; L-Serine; L-Methionine; L-Valine; L-Alanine; L-Lysine; L-Isoleucine; L-Leucine; L-Threonine; L-Tryptophan; L-Methionyl-tRNA; 10-Formyltetrahydrofolate; L-Tyrosine; L-Proline; L-Glutamate; Glutaminyl-tRNA; L-Asparaginyl-tRNA(Asn); L-Seryl-tRNA(Sec); O-Phosphoseryl-tRNA(Sec); L-Histidyl-tRNA(His);…	http://www.genome.jp/kegg-bin/show_pathway?hsa00970
Steroid biosynthesis	42	1	0.0080859	0.037195	6.84811	Calcitriol	Vitamin D3; Delta7-Avenasterol; Zymosterol; Calcidiol; 7-Dehydrocholesterol; Lathosterol; 5alpha-Cholest-8-en-3beta-ol; Episterol; 24-Methylenecholesterol; 5-Dehydroepisterol; Cholesterol; 7-Dehydrodesmosterol; 14-Demethyllanosterol; Isofucosterol; Obtusifoliol; 4alpha-Methyl-5alpha-ergosta-8,14,24(28)-trien-3beta-ol; 5-Dehydroavenasterol; (S)-2,3-Epoxysqualene; 4,4-Dimethyl-5alpha-cholesta-8,14,…	http://www.genome.jp/kegg-bin/show_pathway?hsa00100
Tryptophan metabolism	41	3	0.01105	0.046208	6.32503	L-Tryptophan,Tryptamine,N-Methyltryptamine	L-Tryptophan; Melatonin; N-Acetylserotonin; Serotonin; 5-Hydroxyindoleacetate; 5-Hydroxykynurenamine; 5-Hydroxykynurenine; 5-Hydroxy-L-tryptophan; L-Formylkynurenine; Acetoacetyl-CoA; (S)-3-Hydroxybutanoyl-CoA; Crotonoyl-CoA; Glutaryl-CoA; 2-Oxoadipate; 2-Aminomuconate semialdehyde; 2-Amino-3-carboxymuconate semialdehyde; 3-Hydroxyanthranilate; L-Kynurenine; Formylanthranilate; 3-Hydroxy-L-kynure…	http://www.genome.jp/kegg-bin/show_pathway?hsa00380
Retinol metabolism	17	1	0.024891	0.095417	4.97017	11-cis-Retinol	Retinol; Retinal; beta-Carotene; 11-cis-Retinal; Retinyl ester; 9-cis-Retinol; 11-cis-Retinol; Retinoate; 9-cis-Retinal; all-trans-13,14-Dihydroretinol; 11-cis-Retinyl palmitate; all-trans-4-Hydroxyretinoic acid; all-trans-18-Hydroxyretinoic acid; all-trans-5,6-Epoxyretinoic acid; 9-cis-Retinoic acid; all-trans-Retinoyl-beta-glucuronide; all-trans-3,4-Didehydroretinol	http://www.genome.jp/kegg-bin/show_pathway?hsa00830
Lysine degradation	25	1	0.031381	0.10311	4.58649	L-Lysine	L-Lysine; 4-Trimethylammoniobutanoate; 4-Trimethylammoniobutanal; N6,N6,N6-Trimethyl-L-lysine; Protein N6-methyl-L-lysine; Protein lysine; Procollagen 5-hydroxy-L-lysine; Protein N6,N6-dimethyl-L-lysine; Crotonoyl-CoA; (S)-3-Hydroxybutanoyl-CoA; N6-(L-1,3-Dicarboxypropyl)-L-lysine; L-2-Aminoadipate 6-semialdehyde; L-2-Aminoadipate; 2-Oxoadipate; Acetoacetyl-CoA; Glutaryl-CoA; L-Pipecolate; 5-Phos…	http://www.genome.jp/kegg-bin/show_pathway?hsa00310
Biotin metabolism	10	1	0.031381	0.10311	4.58649	L-Lysine	Biotin; Biotinyl-5'-AMP; Biocytin; Glutaryl-[acp] methyl ester; Malonyl-[acyl-carrier protein]; Malonyl-[acp] methyl ester; Holo-[carboxylase]; L-Lysine; 3-Ketopimeloyl-[acp] methyl ester; 3-Ketoglutaryl-[acp] methyl ester	http://www.genome.jp/kegg-bin/show_pathway?hsa00780
beta-Alanine metabolism	21	3	0.07163	0.20904	3.22133	Carnosine,Uracil,L-Histidine	Propanoyl-CoA; 3-Hydroxypropionyl-CoA; 3-Hydroxypropanoate; Malonyl-CoA; 3-Oxopropanoate; beta-Alanine; L-Aspartate; 1,3-Diaminopropane; 3-Aminopropanal; 3-Ureidopropionate; 5,6-Dihydrouracil; Carnosine; beta-Alanyl-N(pi)-methyl-L-histidine; Spermine; Propenoyl-CoA; Acetyl-CoA; beta-Alanyl-L-arginine; Uracil; beta-Alanyl-L-lysine; L-Histidine; Spermidine	http://www.genome.jp/kegg-bin/show_pathway?hsa00410
Histidine metabolism	16	2	0.072709	0.20904	3.21589	L-Histidine,Carnosine	L-Glutamate; 4-Imidazolone-5-propanoate; Urocanate; L-Histidine; Carnosine; Imidazole-4-acetaldehyde; N-Methylhistamine; Methylimidazole acetaldehyde; Histamine; N(pi)-Methyl-L-histidine; N-Formyl-L-aspartate; N-Formimino-L-glutamate; beta-Alanyl-N(pi)-methyl-L-histidine; Imidazole-4-acetate; Methylimidazoleacetic acid; L-Aspartate	http://www.genome.jp/kegg-bin/show_pathway?hsa00340
Arginine and proline metabolism	38	6	0.083311	0.22543	2.99592	L-Arginine,Creatine,L-Proline,cis-4-Hydroxy-D-proline,Phosphocreatine,1-Pyrroline-4-hydroxy-2-carboxylate	L-Arginine; N(omega)-Hydroxyarginine; Guanidinoacetate; Creatine; 4-Aminobutanoate; Agmatine; Putrescine; 4-Aminobutyraldehyde; S-Adenosylmethioninamine; S-Adenosyl-L-methionine; Spermidine; N-Acetylputrescine; N4-Acetylaminobutanal; Spermine; trans-3-Hydroxy-L-proline; D-Proline; (4R)-4-Hydroxy-2-oxoglutarate; L-erythro-4-Hydroxyglutamate; L-4-Hydroxyglutamate semialdehyde; L-1-Pyrroline-3-hydro…	http://www.genome.jp/kegg-bin/show_pathway?hsa00330
Steroid hormone biosynthesis	85	2	0.13128	0.33548	2.2827	Aldosterone,Cortisol	Cholesterol; 20alpha,22beta-Dihydroxycholesterol; 20alpha-Hydroxycholesterol; 17alpha,20alpha-Dihydroxycholesterol; Pregnenolone; 21-Hydroxypregnenolone; 17alpha-Hydroxypregnenolone; 17alpha,21-Dihydroxypregnenolone; 11beta,17alpha,21-Trihydroxypregnenolone; Dehydroepiandrosterone; Dehydroepiandrosterone sulfate; 16alpha-Hydroxydehydroepiandrosterone; Androstenediol; 11-Deoxycorticosterone; 5alph…	http://www.genome.jp/kegg-bin/show_pathway?hsa00140
Pyrimidine metabolism	39	4	0.22954	0.492	1.43043	L-Glutamine,Uridine,Cytidine,Uracil	UDP; L-Glutamine; Carbamoyl phosphate; (S)-Dihydroorotate; Orotidine 5'-phosphate; UMP; UTP; Uridine; 5,6-Dihydrouracil; 3-Ureidopropionate; CTP; CDP; CMP; Cytidine; dCDP; dCMP; dCTP; Deoxycytidine; dUTP; dUDP; dUMP; Deoxyuridine; dTDP; dTTP; dTMP; Thymidine; Thymine; (R)-5,6-Dihydrothymine; (R)-3-Ureidoisobutyrate; P1,P4-Bis(5'-uridyl) tetraphosphate; 2'-Deoxy-5-hydroxymethylcytidine-5'-diphosph…	http://www.genome.jp/kegg-bin/show_pathway?hsa00240
Thiamine metabolism	7	1	0.23309	0.492	1.4351	L-Cysteine	[Enzyme]-cysteine; L-Cysteine; Thiamine; Thiamin triphosphate; Thiamin diphosphate; Thiamin monophosphate; [Enzyme]-S-sulfanylcysteine	http://www.genome.jp/kegg-bin/show_pathway?hsa00730
Glutathione metabolism	28	3	0.23312	0.492	1.43417	Glutathione,Glycine,L-Cysteine	R-S-Cysteinylglycine; R-S-Glutathione; Glutathione; NADP+; Glutathione disulfide; NADPH; Glycine; gamma-L-Glutamyl-L-cysteine; L-Glutamate; L-Cysteine; Cys-Gly; 5-Oxoproline; L-Amino acid; (5-L-Glutamyl)-L-amino acid; S-Substituted L-cysteine; Acetyl-CoA; RX; L-Ornithine; Putrescine; Spermidine; Cadaverine; Tryparedoxin; Trypanothione; S-Substituted N-acetyl-L-cysteine; Spermine; Aminopropylcadav…	http://www.genome.jp/kegg-bin/show_pathway?hsa00480
Glycine, serine and threonine metabolism	33	8	0.24093	0.492	1.38139	L-Serine,Choline,Betaine,Glycine,Sarcosine,L-Threonine,Creatine,L-Cysteine	L-Serine; Choline; Betaine aldehyde; Betaine; Guanidinoacetate; 3-Phospho-D-glycerate; N,N-Dimethylglycine; L-Cystathionine; Glycine; O-Phospho-L-serine; Sarcosine; 5,10-Methylenetetrahydrofolate; L-Threonine; Lipoylprotein; Aminoacetone; D-Glycerate; [Protein]-S8-aminomethyldihydrolipoyllysine; Tetrahydrofolate; Dihydrolipoylprotein; 2-Phospho-D-glycerate; D-Serine; Hydroxypyruvate; Creatine; 3-…	http://www.genome.jp/kegg-bin/show_pathway?hsa00260
Pantothenate and CoA biosynthesis	19	4	0.25123	0.492	1.3269	Pantetheine,L-Valine,L-Cysteine,Uracil	Dephospho-CoA; Pantetheine 4'-phosphate; Pantetheine; (R)-4'-Phosphopantothenoyl-L-cysteine; N-((R)-Pantothenoyl)-L-cysteine; Pantothenate; 3-Ureidopropionate; 5,6-Dihydrouracil; L-Valine; L-Aspartate; Apo-[acyl-carrier-protein]; CoA; D-4'-Phosphopantothenate; L-Cysteine; beta-Alanine; Uracil; 3-Methyl-2-oxobutanoic acid; Adenosine 3',5'-bisphosphate; Acyl-carrier protein	http://www.genome.jp/kegg-bin/show_pathway?hsa00770
D-Glutamine and D-glutamate metabolism	6	1	0.26739	0.492	1.24292	L-Glutamine	D-Glutamate; L-Glutamate; D-Glutamine; L-Glutamine; 5-Oxo-D-proline; 2-Oxoglutarate	http://www.genome.jp/kegg-bin/show_pathway?hsa00471
Nitrogen metabolism	6	1	0.26739	0.492	1.24292	L-Glutamine	CO2; Ammonia; L-Glutamate; HCO3-; Carbamoyl phosphate; L-Glutamine	http://www.genome.jp/kegg-bin/show_pathway?hsa00910
Caffeine metabolism	10	6	0.28101	0.49717	1.17017	1-Methylxanthine,Theobromine,7-Methylxanthine,1-Methyluric acid,1,7-Dimethyluric acid,7-Methyluric acid	1,7-Dimethylxanthine; 1-Methylxanthine; Theobromine; 7-Methylxanthine; Caffeine; 1-Methyluric acid; 3,7-Dimethyluric acid; 1,7-Dimethyluric acid; 5-Acetylamino-6-formylamino-3-methyluracil; 7-Methyluric acid	http://www.genome.jp/kegg-bin/show_pathway?hsa00232
Glyoxylate and dicarboxylate metabolism	32	3	0.29264	0.49858	1.12078	L-Serine,Glycine,L-Glutamine	Hydroxypyruvate; cis-Aconitate; 4-Hydroxy-2-oxoglutarate; N-Formylderivatives; Glycolate; Citrate; (S)-Malate; 2-Phosphoglycolate; Acetyl-CoA; (S)-Methylmalonyl-CoA; Propanoyl-CoA; (R)-Methylmalonyl-CoA; Glyoxylate; L-Serine; Glycine; Hydrogen peroxide; L-Glutamate; (2S)-Ethylmalonyl-CoA; D-Glycerate; Acetate; 2-Hydroxy-3-oxopropanoate; Isocitrate; Pyruvate; Formate; Oxaloacetate; Acetoacetyl-CoA…	http://www.genome.jp/kegg-bin/show_pathway?hsa00630
Selenocompound metabolism	20	1	0.31484	0.5011	1.02218	L-Alanine	Selenite; Hydrogen selenide; L-Selenocysteine; L-Selenomethionine; Se-Methyl-L-selenocysteine; O-Phosphoseryl-tRNA(Sec); Selenophosphoric acid; L-Seryl-tRNA(Sec); Selenate; L-Selenocystathionine; Selenohomocysteine; Methylselenic acid; Dimethyl selenide; L-Alanine; Selenomethionyl-tRNA(Met); Methaneselenol; Methylselenopyruvate; L-Selenocysteinyl-tRNA(Sec); Adenylylselenate; Trimethylselenonium	http://www.genome.jp/kegg-bin/show_pathway?hsa00450
Alanine, aspartate and glutamate metabolism	28	2	0.31591	0.5011	1.14824	L-Alanine,L-Glutamine	N-Acetyl-L-aspartate; 2-Oxosuccinamate; L-Aspartate; L-Asparagine; D-Aspartate; N-(L-Arginino)succinate; N6-(1,2-Dicarboxyethyl)-AMP; L-Alanine; Succinate semialdehyde; L-Glutamate; 4-Aminobutanoate; L-Glutamine; Ammonia; 2-Oxoglutaramate; (S)-1-Pyrroline-5-carboxylate; N-Acetylaspartylglutamate; N-Acetylaspartylglutamylglutamate; Citrate; Oxaloacetate; Fumarate; Pyruvate; N-Carbamoyl-L-aspartate…	http://www.genome.jp/kegg-bin/show_pathway?hsa00250
Neomycin, kanamycin and gentamicin biosynthesis	2	1	0.39049	0.59875	0.747327	D-Glucose	D-Glucose; D-Glucose 6-phosphate	http://www.genome.jp/kegg-bin/show_pathway?hsa00524
Purine metabolism	65	9	0.47218	0.70066	0.566298	Xanthine,L-Glutamine,Adenosine,Deoxyinosine,Xanthosine,Hypoxanthine,Inosine,Adenine,Urea	GDP; Xanthine; D-Ribose 5-phosphate; L-Glutamine; 5-Phospho-alpha-D-ribose 1-diphosphate; 5-Phosphoribosylamine; 5'-Phosphoribosylglycinamide; 2-(Formamido)-N1-(5'-phosphoribosyl)acetamidine; 1-(5'-Phosphoribosyl)-5-amino-4-imidazolecarboxamide; 1-(5'-Phosphoribosyl)-5-amino-4-(N-succinocarboxamide)-imidazole; 1-(5-Phospho-D-ribosyl)-5-amino-4-imidazolecarboxylate; 1-(5'-Phosphoribosyl)-5-formami…	http://www.genome.jp/kegg-bin/show_pathway?hsa00230
Cysteine and methionine metabolism	33	4	0.50227	0.72202	0.703952	L-Serine,L-Methionine,L-Cystine,L-Cysteine	4-Methylthio-2-oxobutanoic acid; 1,2-Dihydroxy-5-(methylthio)pent-1-en-3-one; S-Methyl-5-thio-D-ribulose 1-phosphate; S-Methyl-5-thio-D-ribose 1-phosphate; 5'-Methylthioadenosine; S-Adenosylmethioninamine; S-Adenosyl-L-methionine; L-Cystathionine; L-Serine; L-Homocysteine; L-Methionine; S-Adenosyl-L-homocysteine; 2,3-Diketo-5-methylthiopentyl-1-phosphate; L-Cysteate; L-Cystine; L-Cysteine; 3-Sulf…	http://www.genome.jp/kegg-bin/show_pathway?hsa00270
Porphyrin and chlorophyll metabolism	30	4	0.55194	0.76174	0.49218	Glycine,Biliverdin,Porphobilinogen,D-Urobilinogen	Cobinamide; Heme O; Heme; Glycine; Bilirubin beta-diglucuronide; Cob(I)yrinate a,c diamide; Fe2+; Biliverdin; Cob(I)alamin; Protoporphyrinogen IX; Coproporphyrinogen III; Uroporphyrinogen III; Hydroxymethylbilane; Porphobilinogen; 5-Aminolevulinate; Uroporphyrinogen I; L-Glutamate; Bilirubin; Protoporphyrin; Coproporphyrin III; Adenosyl cobinamide; Heme A; D-Urobilinogen; Adenosyl cobyrinate a,c …	http://www.genome.jp/kegg-bin/show_pathway?hsa00860
Valine, leucine and isoleucine degradation	40	2	0.57955	0.76174	0.327344	L-Valine,L-Isoleucine	Enzyme N6-(lipoyl)lysine; 2-Methyl-1-hydroxybutyl-ThPP; Enzyme N6-(dihydrolipoyl)lysine; 2-Methyl-1-hydroxypropyl-ThPP; 3-Methyl-1-hydroxybutyl-ThPP; Acetyl-CoA; Acetoacetyl-CoA; Acetoacetate; (S)-3-Hydroxy-3-methylglutaryl-CoA; 3-Methylcrotonyl-CoA; 3-Methylbutanoyl-CoA; Thiamin diphosphate; (S)-3-Methyl-2-oxopentanoic acid; L-Valine; 2-Methylacetoacetyl-CoA; (S)-3-Hydroxyisobutyrate; 2-Methylbu…	http://www.genome.jp/kegg-bin/show_pathway?hsa00280
Valine, leucine and isoleucine biosynthesis	8	3	0.57959	0.76174	0.327327	L-Threonine,L-Isoleucine,L-Valine	L-Threonine; (S)-3-Methyl-2-oxopentanoic acid; L-Leucine; 3-Methyl-2-oxobutanoic acid; 2-Oxobutanoate; L-Isoleucine; 4-Methyl-2-oxopentanoate; L-Valine	http://www.genome.jp/kegg-bin/show_pathway?hsa00290
alpha-Linolenic acid metabolism	13	1	0.62746	0.80175	0.239405	Stearidonic acid	OPC4-CoA; OPC6-CoA; 3-Oxo-OPC4-CoA; 3-Oxo-OPC6-CoA; 3-Oxo-OPC8-CoA; OPC8-CoA; Phosphatidylcholine; (9Z,12Z,15Z)-Octadecatrienoic acid; trans-2-Enoyl-OPC4-CoA; trans-2-Enoyl-OPC6-CoA; (+)-7-Isojasmonic acid CoA; trans-2-Enoyl-OPC8-CoA; Stearidonic acid	http://www.genome.jp/kegg-bin/show_pathway?hsa00592
Sphingolipid metabolism	21	1	0.71475	0.88372	0.135861	L-Serine	Dihydroceramide; Ceramide 1-phosphate; Sphingosine 1-phosphate; Sphinganine 1-phosphate; Phytoceramide; Sphinganine; Sphingomyelin; Sphingosine; N-Acylsphingosine; L-Serine; Palmitoyl-CoA; 3-Dehydrosphinganine; Digalactosylceramide; Galactosylceramide; GM4; Lactosylceramide; Glucosylceramide; Sulfatide; Phytosphingosine; Digalactosylceramide sulfate; Ethanolamine phosphate	http://www.genome.jp/kegg-bin/show_pathway?hsa00600
Amino sugar and nucleotide sugar metabolism	37	2	0.76253	0.88372	0.0929027	N-Acetyl-D-glucosamine,D-Mannose	N-Acetyl-D-glucosamine; N-Acetyl-D-glucosamine 6-phosphate; N-Acetyl-alpha-D-glucosamine 1-phosphate; UDP-N-acetyl-alpha-D-glucosamine; N-Acetyl-D-mannosamine; N-Acetylneuraminate 9-phosphate; N-Acetylneuraminate; alpha-D-Galactose 1-phosphate; UDP-glucose; D-Glucose 1-phosphate; UDP-glucuronate; D-Glucosamine 6-phosphate; D-Mannose 6-phosphate; GDP-mannose; D-Fructose 6-phosphate; alpha-D-Glucos…	http://www.genome.jp/kegg-bin/show_pathway?hsa00520
Starch and sucrose metabolism	18	2	0.77082	0.88372	0.0865533	D-Fructose,D-Glucose	Cellodextrin; Cellobiose; D-Fructose; Sucrose; beta-D-Glucoside; UDP-glucose; D-Glucose 1-phosphate; D-Glucose 6-phosphate; D-Glucose; Amylose; alpha,alpha-Trehalose; Maltodextrin; Starch; Maltose; Dextrin; Isomaltose; D-Fructose 6-phosphate; alpha-D-Glucose 1,6-bisphosphate	http://www.genome.jp/kegg-bin/show_pathway?hsa00500
Ascorbate and aldarate metabolism	8	1	0.81205	0.88372	0.0575342	myo-Inositol	myo-Inositol; UDP-glucose; L-Gulono-1,4-lactone; D-Glucuronolactone; UDP-glucuronate; D-Glucuronate; L-Gulonate; D-Glucarate	http://www.genome.jp/kegg-bin/show_pathway?hsa00053
Inositol phosphate metabolism	30	1	0.81205	0.88372	0.0575342	myo-Inositol	1-Phosphatidyl-1D-myo-inositol 5-phosphate; 1-Phosphatidyl-D-myo-inositol 4,5-bisphosphate; D-myo-Inositol 1,4,5-trisphosphate; 1D-myo-Inositol 1,4,5,6-tetrakisphosphate; Phosphatidylinositol-3,4,5-trisphosphate; 1D-myo-Inositol 1,3,4,5-tetrakisphosphate; 1D-myo-Inositol 1,3,4-trisphosphate; 1D-myo-Inositol 1,3,4,6-tetrakisphosphate; 1D-myo-Inositol 3,4,5,6-tetrakisphosphate; 1D-myo-Inositol 1,4-…	http://www.genome.jp/kegg-bin/show_pathway?hsa00562
Phosphatidylinositol signaling system	28	1	0.81205	0.88372	0.0575342	myo-Inositol	1-Phosphatidyl-1D-myo-inositol 3-phosphate; 1D-myo-Inositol 1,3,4,5,6-pentakisphosphate; 1-Phosphatidyl-D-myo-inositol; 1-Phosphatidyl-D-myo-inositol 4,5-bisphosphate; myo-Inositol; CDP-diacylglycerol; 1-Phosphatidyl-1D-myo-inositol 4-phosphate; Phosphatidate; 1,2-Diacyl-sn-glycerol; 1-Phosphatidyl-1D-myo-inositol 3,4-bisphosphate; 1-Phosphatidyl-1D-myo-inositol 5-phosphate; 1D-myo-Inositol 1,3,4…	http://www.genome.jp/kegg-bin/show_pathway?hsa04070
Riboflavin metabolism	4	1	0.82608	0.88372	0.0491305	Riboflavin	Riboflavin; FMN; FAD; Reduced riboflavin	http://www.genome.jp/kegg-bin/show_pathway?hsa00740
Fructose and mannose metabolism	20	2	0.85059	0.88926	0.0894943	D-Fructose,D-Mannose	D-Sorbitol; D-Fructose; D-Mannose; beta-D-Fructose 2,6-bisphosphate; D-Mannose 6-phosphate; L-Fucose 1-phosphate; GDP-4-dehydro-6-deoxy-D-mannose; GDP-mannose; D-Mannose 1-phosphate; beta-D-Fructose 6-phosphate; D-Glyceraldehyde 3-phosphate; D-Fructose 1-phosphate; D-Glyceraldehyde; beta-D-Fructose 1,6-bisphosphate; 6-Deoxy-L-galactose; L-Fuconate; alpha-D-Glucose; GDP-L-fucose; Glycerone phospha…	http://www.genome.jp/kegg-bin/show_pathway?hsa00051
Galactose metabolism	27	5	0.87111	0.89047	0.0884318	D-Glucose,D-Fructose,Galactitol,D-Mannose,myo-Inositol	Stachyose; D-Tagatose 6-phosphate; D-Gal alpha 1->6D-Gal alpha 1->6D-Glucose; Sucrose; Raffinose; Melibiose; D-Galactose; 3-beta-D-Galactosyl-sn-glycerol; Epimelibiose; Melibiitol; alpha-D-Galactosyl-(1->3)-1D-myo-inositol; alpha-D-Glucose; Lactose; D-Glucose 1-phosphate; UDP-alpha-D-galactose; UDP-glucose; alpha-D-Galactose 1-phosphate; alpha-D-Galactose; alpha-D-Glucose 6-phosphate; D-Tagatose …	http://www.genome.jp/kegg-bin/show_pathway?hsa00052
Arginine biosynthesis	14	4	0.89698	0.89698	0.0176881	L-Arginine,N-Acetylornithine,L-Glutamine,Urea	L-Glutamate; L-Arginine; N-Acetylornithine; N-(L-Arginino)succinate; L-Citrulline; L-Aspartate; Carbamoyl phosphate; L-Ornithine; Ammonia; L-Glutamine; 2-Oxoglutarate; N-Acetyl-L-glutamate; Urea; Fumarate	http://www.genome.jp/kegg-bin/show_pathway?hsa00220

## Sheet: Table4
#Kegg_pathway	ko_ID	Unique compound	compound	Uni_all	compound_all	cpd_ID
Cysteine and methionine metabolism	ko00270	4	16	47	251	C00170+C00051+C00491+C01005
Metabolic pathways	ko01100	39	211	47	251	C01571+C00170+C11516+C00346+C06730+C01005+C16357+C00362+C00245+C13747+C02727+C00020+C00219+C01367+C00822+C00106+C00431+C01586+C05843+C05629+C00249+C00262+C00633+C00051+C07480+C14772+C00294+C01921+C00026+C05512+C01157+C07130+C00491+C00581+C00488+C05634+C02376+C00755+C00380
ABC transporters	ko02010	6	41	47	251	C01157+C05512+C00294+C00245+C00051+C00491
Ferroptosis	ko04216	3	7	47	251	C00051+C00491+C00219
Protein digestion and absorption	ko04974	1	22	47	251	C00491
Glycine, serine and threonine metabolism	ko00260	2	16	47	251	C00581+C01005
Aminoacyl-tRNA biosynthesis	ko00970	1	20	47	251	C01005
Carbon metabolism	ko01200	3	15	47	251	C01005+C00488+C00026
Biosynthesis of amino acids	ko01230	2	36	47	251	C00026+C01005
Primary bile acid biosynthesis	ko00120	2	4	47	251	C00245+C01921
Bile secretion	ko04976	4	15	47	251	C00051+C06804+C00026+C01921
Cholesterol metabolism	ko04979	1	2	47	251	C01921
Pyrimidine metabolism	ko00240	3	19	47	251	C00106+C00380+C02376
Purine metabolism	ko00230	6	15	47	251	C00362+C05512+C00262+C00294+C01367+C00020
Biosynthesis of cofactors	ko01240	3	42	47	251	C00051+C00020+C00026
Antifolate resistance	ko01523	1	3	47	251	C00020
cGMP-PKG signaling pathway	ko04022	1	2	47	251	C00020
cAMP signaling pathway	ko04024	1	9	47	251	C00020
FoxO signaling pathway	ko04068	1	3	47	251	C00020
mTOR signaling pathway	ko04150	1	2	47	251	C00020
PI3K-Akt signaling pathway	ko04151	1	1	47	251	C00020
AMPK signaling pathway	ko04152	1	3	47	251	C00020
Longevity regulating pathway	ko04211	1	1	47	251	C00020
Olfactory transduction	ko04740	1	1	47	251	C00020
Taste transduction	ko04742	1	6	47	251	C00020
Regulation of lipolysis in adipocytes	ko04923	2	5	47	251	C00020+C00219
Renin secretion	ko04924	1	4	47	251	C00020
Aldosterone synthesis and secretion	ko04925	2	4	47	251	C00219+C00020
Cortisol synthesis and secretion	ko04927	1	2	47	251	C00020
Parathyroid hormone synthesis, secretion and action	ko04928	1	2	47	251	C00020
Cushing syndrome	ko04934	1	2	47	251	C00020
Parkinson disease	ko05012	1	3	47	251	C00020
Pathways of neurodegeneration - multiple diseases	ko05022	1	4	47	251	C00020
Morphine addiction	ko05032	1	2	47	251	C00020
Citrate cycle (TCA cycle)	ko00020	1	5	47	251	C00026
Pentose and glucuronate interconversions	ko00040	1	4	47	251	C00026
Ascorbate and aldarate metabolism	ko00053	1	5	47	251	C00026
Arginine biosynthesis	ko00220	1	10	47	251	C00026
Alanine, aspartate and glutamate metabolism	ko00250	1	12	47	251	C00026
Lysine degradation	ko00310	3	10	47	251	C00026+C02727+C00431
Histidine metabolism	ko00340	2	9	47	251	C00026+C05135
Taurine and hypotaurine metabolism	ko00430	2	6	47	251	C00026+C00245
D-Glutamine and D-glutamate metabolism	ko00471	1	3	47	251	C00026
Glyoxylate and dicarboxylate metabolism	ko00630	1	9	47	251	C00026
Butanoate metabolism	ko00650	1	7	47	251	C00026
2-Oxocarboxylic acid metabolism	ko01210	1	15	47	251	C00026
HIF-1 signaling pathway	ko04066	1	5	47	251	C00026
GABAergic synapse	ko04727	1	4	47	251	C00026
Glucagon signaling pathway	ko04922	1	7	47	251	C00026
Proximal tubule bicarbonate reclamation	ko04964	1	5	47	251	C00026
Central carbon metabolism in cancer	ko05230	1	24	47	251	C00026
Sulfur metabolism	ko00920	1	8	47	251	C00245
Neuroactive ligand-receptor interaction	ko04080	1	14	47	251	C00245
Phenylalanine metabolism	ko00360	2	16	47	251	C01586+C05629
Glycosylphosphatidylinositol (GPI)-anchor biosynthesis	ko00563	1	1	47	251	C00346
Glycerophospholipid metabolism	ko00564	2	7	47	251	C00670+C00346
Sphingolipid metabolism	ko00600	1	2	47	251	C00346
Sphingolipid signaling pathway	ko04071	1	3	47	251	C00346
Fatty acid biosynthesis	ko00061	2	5	47	251	C01571+C00249
Fatty acid elongation	ko00062	1	1	47	251	C00249
Fatty acid degradation	ko00071	1	2	47	251	C00249
Biosynthesis of unsaturated fatty acids	ko01040	3	9	47	251	C00219+C00249+C16522
Fatty acid metabolism	ko01212	1	2	47	251	C00249
Arachidonic acid metabolism	ko00590	3	5	47	251	C14772+C04577+C00219
Linoleic acid metabolism	ko00591	2	8	47	251	C00219+C14766
Necroptosis	ko04217	1	1	47	251	C00219
Vascular smooth muscle contraction	ko04270	1	3	47	251	C00219
Platelet activation	ko04611	1	1	47	251	C00219
Fc epsilon RI signaling pathway	ko04664	1	2	47	251	C00219
Fc gamma R-mediated phagocytosis	ko04666	1	2	47	251	C00219
Retrograde endocannabinoid signaling	ko04723	1	2	47	251	C00219
Serotonergic synapse	ko04726	2	4	47	251	C14772+C00219
Long-term depression	ko04730	1	2	47	251	C00219
Inflammatory mediator regulation of TRP channels	ko04750	1	1	47	251	C00219
GnRH signaling pathway	ko04912	1	2	47	251	C00219
Ovarian steroidogenesis	ko04913	1	1	47	251	C00219
Oxytocin signaling pathway	ko04921	1	1	47	251	C00219
Leishmaniasis	ko05140	1	1	47	251	C00219
Amoebiasis	ko05146	1	2	47	251	C00219
Caffeine metabolism	ko00232	5	9	47	251	C07130+C16357+C16359+C13747+C07480
Tryptophan metabolism	ko00380	1	14	47	251	C05634
Nitrogen metabolism	ko00910	1	3	47	251	C00488
Fructose and mannose metabolism	ko00051	1	5	47	251	C11516
Glutathione metabolism	ko00480	1	12	47	251	C00051
Thyroid hormone synthesis	ko04918	1	5	47	251	C00051
Diabetic cardiomyopathy	ko05415	1	7	47	251	C00051
Arginine and proline metabolism	ko00330	3	18	47	251	C00581+C00431+C01157
Nicotinate and nicotinamide metabolism	ko00760	1	11	47	251	C05843
beta-Alanine metabolism	ko00410	1	9	47	251	C00106
Pantothenate and CoA biosynthesis	ko00770	1	9	47	251	C00106
Ether lipid metabolism	ko00565	1	1	47	251	C00670
Choline metabolism in cancer	ko05231	1	4	47	251	C00670
Riboflavin metabolism	ko00740	1	4	47	251	C01727
Tyrosine metabolism	ko00350	1	15	47	251	C00822

## Sheet: Table5
#Kegg_pathway	ko_id	Cluter_frequency	Genome_frequency	P-value	FDR
Caffeine metabolism	ko00232	5 out of 47 10.6382978723404%	9 out of 251 3.58565737051793%	0.0131353	1
Purine metabolism	ko00230	6 out of 47 12.7659574468085%	15 out of 251 5.97609561752988%	0.0408866	1
Arachidonic acid metabolism	ko00590	3 out of 47 6.38297872340426%	5 out of 251 1.99203187250996%	0.0468496	1
Ferroptosis	ko04216	3 out of 47 6.38297872340426%	7 out of 251 2.78884462151394%	0.123953	1
Serotonergic synapse	ko04726	2 out of 47 4.25531914893617%	4 out of 251 1.59362549800797%	0.160226	1
Primary bile acid biosynthesis	ko00120	2 out of 47 4.25531914893617%	4 out of 251 1.59362549800797%	0.160226	1
Aldosterone synthesis and secretion	ko04925	2 out of 47 4.25531914893617%	4 out of 251 1.59362549800797%	0.160226	1
Fatty acid elongation	ko00062	1 out of 47 2.12765957446809%	1 out of 251 0.398406374501992%	0.187251	1
Ether lipid metabolism	ko00565	1 out of 47 2.12765957446809%	1 out of 251 0.398406374501992%	0.187251	1
Oxytocin signaling pathway	ko04921	1 out of 47 2.12765957446809%	1 out of 251 0.398406374501992%	0.187251	1
Leishmaniasis	ko05140	1 out of 47 2.12765957446809%	1 out of 251 0.398406374501992%	0.187251	1
PI3K-Akt signaling pathway	ko04151	1 out of 47 2.12765957446809%	1 out of 251 0.398406374501992%	0.187251	1
Ovarian steroidogenesis	ko04913	1 out of 47 2.12765957446809%	1 out of 251 0.398406374501992%	0.187251	1
Inflammatory mediator regulation of TRP channels	ko04750	1 out of 47 2.12765957446809%	1 out of 251 0.398406374501992%	0.187251	1
Glycosylphosphatidylinositol (GPI)-anchor biosynthesis	ko00563	1 out of 47 2.12765957446809%	1 out of 251 0.398406374501992%	0.187251	1
Necroptosis	ko04217	1 out of 47 2.12765957446809%	1 out of 251 0.398406374501992%	0.187251	1
Olfactory transduction	ko04740	1 out of 47 2.12765957446809%	1 out of 251 0.398406374501992%	0.187251	1
Longevity regulating pathway	ko04211	1 out of 47 2.12765957446809%	1 out of 251 0.398406374501992%	0.187251	1
Platelet activation	ko04611	1 out of 47 2.12765957446809%	1 out of 251 0.398406374501992%	0.187251	1
Biosynthesis of unsaturated fatty acids	ko01040	3 out of 47 6.38297872340426%	9 out of 251 3.58565737051793%	0.226066	1
Fatty acid biosynthesis	ko00061	2 out of 47 4.25531914893617%	5 out of 251 1.99203187250996%	0.23581	1
Regulation of lipolysis in adipocytes	ko04923	2 out of 47 4.25531914893617%	5 out of 251 1.99203187250996%	0.23581	1
Lysine degradation	ko00310	3 out of 47 6.38297872340426%	10 out of 251 3.98406374501992%	0.282134	1
Bile secretion	ko04976	4 out of 47 8.51063829787234%	15 out of 251 5.97609561752988%	0.301564	1
Taurine and hypotaurine metabolism	ko00430	2 out of 47 4.25531914893617%	6 out of 251 2.39043824701195%	0.313008	1
Long-term depression	ko04730	1 out of 47 2.12765957446809%	2 out of 251 0.796812749003984%	0.340048	1
Fatty acid degradation	ko00071	1 out of 47 2.12765957446809%	2 out of 251 0.796812749003984%	0.340048	1
mTOR signaling pathway	ko04150	1 out of 47 2.12765957446809%	2 out of 251 0.796812749003984%	0.340048	1
Morphine addiction	ko05032	1 out of 47 2.12765957446809%	2 out of 251 0.796812749003984%	0.340048	1
Retrograde endocannabinoid signaling	ko04723	1 out of 47 2.12765957446809%	2 out of 251 0.796812749003984%	0.340048	1
Cholesterol metabolism	ko04979	1 out of 47 2.12765957446809%	2 out of 251 0.796812749003984%	0.340048	1
Fc epsilon RI signaling pathway	ko04664	1 out of 47 2.12765957446809%	2 out of 251 0.796812749003984%	0.340048	1
Fatty acid metabolism	ko01212	1 out of 47 2.12765957446809%	2 out of 251 0.796812749003984%	0.340048	1
Parathyroid hormone synthesis, secretion and action	ko04928	1 out of 47 2.12765957446809%	2 out of 251 0.796812749003984%	0.340048	1
Fc gamma R-mediated phagocytosis	ko04666	1 out of 47 2.12765957446809%	2 out of 251 0.796812749003984%	0.340048	1
Cortisol synthesis and secretion	ko04927	1 out of 47 2.12765957446809%	2 out of 251 0.796812749003984%	0.340048	1
GnRH signaling pathway	ko04912	1 out of 47 2.12765957446809%	2 out of 251 0.796812749003984%	0.340048	1
Sphingolipid metabolism	ko00600	1 out of 47 2.12765957446809%	2 out of 251 0.796812749003984%	0.340048	1
Cushing syndrome	ko04934	1 out of 47 2.12765957446809%	2 out of 251 0.796812749003984%	0.340048	1
cGMP-PKG signaling pathway	ko04022	1 out of 47 2.12765957446809%	2 out of 251 0.796812749003984%	0.340048	1
Amoebiasis	ko05146	1 out of 47 2.12765957446809%	2 out of 251 0.796812749003984%	0.340048	1
Cysteine and methionine metabolism	ko00270	4 out of 47 8.51063829787234%	16 out of 251 6.37450199203187%	0.349331	1
Glycerophospholipid metabolism	ko00564	2 out of 47 4.25531914893617%	7 out of 251 2.78884462151394%	0.38863	1
Linoleic acid metabolism	ko00591	2 out of 47 4.25531914893617%	8 out of 251 3.18725099601594%	0.460584	1
Vascular smooth muscle contraction	ko04270	1 out of 47 2.12765957446809%	3 out of 251 1.19521912350598%	0.464617	1
AMPK signaling pathway	ko04152	1 out of 47 2.12765957446809%	3 out of 251 1.19521912350598%	0.464617	1
Sphingolipid signaling pathway	ko04071	1 out of 47 2.12765957446809%	3 out of 251 1.19521912350598%	0.464617	1
Parkinson disease	ko05012	1 out of 47 2.12765957446809%	3 out of 251 1.19521912350598%	0.464617	1
Antifolate resistance	ko01523	1 out of 47 2.12765957446809%	3 out of 251 1.19521912350598%	0.464617	1
Nitrogen metabolism	ko00910	1 out of 47 2.12765957446809%	3 out of 251 1.19521912350598%	0.464617	1
FoxO signaling pathway	ko04068	1 out of 47 2.12765957446809%	3 out of 251 1.19521912350598%	0.464617	1
D-Glutamine and D-glutamate metabolism	ko00471	1 out of 47 2.12765957446809%	3 out of 251 1.19521912350598%	0.464617	1
Histidine metabolism	ko00340	2 out of 47 4.25531914893617%	9 out of 251 3.58565737051793%	0.527589	1
Carbon metabolism	ko01200	3 out of 47 6.38297872340426%	15 out of 251 5.97609561752988%	0.557771	1
Choline metabolism in cancer	ko05231	1 out of 47 2.12765957446809%	4 out of 251 1.59362549800797%	0.566081	1
Riboflavin metabolism	ko00740	1 out of 47 2.12765957446809%	4 out of 251 1.59362549800797%	0.566081	1
Pathways of neurodegeneration - multiple diseases	ko05022	1 out of 47 2.12765957446809%	4 out of 251 1.59362549800797%	0.566081	1
Pentose and glucuronate interconversions	ko00040	1 out of 47 2.12765957446809%	4 out of 251 1.59362549800797%	0.566081	1
GABAergic synapse	ko04727	1 out of 47 2.12765957446809%	4 out of 251 1.59362549800797%	0.566081	1
Renin secretion	ko04924	1 out of 47 2.12765957446809%	4 out of 251 1.59362549800797%	0.566081	1
Fructose and mannose metabolism	ko00051	1 out of 47 2.12765957446809%	5 out of 251 1.99203187250996%	0.648648	1
Proximal tubule bicarbonate reclamation	ko04964	1 out of 47 2.12765957446809%	5 out of 251 1.99203187250996%	0.648648	1
Thyroid hormone synthesis	ko04918	1 out of 47 2.12765957446809%	5 out of 251 1.99203187250996%	0.648648	1
HIF-1 signaling pathway	ko04066	1 out of 47 2.12765957446809%	5 out of 251 1.99203187250996%	0.648648	1
Citrate cycle (TCA cycle)	ko00020	1 out of 47 2.12765957446809%	5 out of 251 1.99203187250996%	0.648648	1
Ascorbate and aldarate metabolism	ko00053	1 out of 47 2.12765957446809%	5 out of 251 1.99203187250996%	0.648648	1
Metabolic pathways	ko01100	39 out of 47 82.9787234042553%	211 out of 251 84.0637450199203%	0.681218	1
Arginine and proline metabolism	ko00330	3 out of 47 6.38297872340426%	18 out of 251 7.17131474103586%	0.691669	1
Taste transduction	ko04742	1 out of 47 2.12765957446809%	6 out of 251 2.39043824701195%	0.715777	1
Pyrimidine metabolism	ko00240	3 out of 47 6.38297872340426%	19 out of 251 7.56972111553785%	0.72919	1
Butanoate metabolism	ko00650	1 out of 47 2.12765957446809%	7 out of 251 2.78884462151394%	0.770301	1
Glucagon signaling pathway	ko04922	1 out of 47 2.12765957446809%	7 out of 251 2.78884462151394%	0.770301	1
Diabetic cardiomyopathy	ko05415	1 out of 47 2.12765957446809%	7 out of 251 2.78884462151394%	0.770301	1
Sulfur metabolism	ko00920	1 out of 47 2.12765957446809%	8 out of 251 3.18725099601594%	0.814546	1
ABC transporters	ko02010	6 out of 47 12.7659574468085%	41 out of 251 16.3346613545817%	0.829031	1
Phenylalanine metabolism	ko00360	2 out of 47 4.25531914893617%	16 out of 251 6.37450199203187%	0.839203	1
Glycine, serine and threonine metabolism	ko00260	2 out of 47 4.25531914893617%	16 out of 251 6.37450199203187%	0.839203	1
Glyoxylate and dicarboxylate metabolism	ko00630	1 out of 47 2.12765957446809%	9 out of 251 3.58565737051793%	0.850416	1
Pantothenate and CoA biosynthesis	ko00770	1 out of 47 2.12765957446809%	9 out of 251 3.58565737051793%	0.850416	1
beta-Alanine metabolism	ko00410	1 out of 47 2.12765957446809%	9 out of 251 3.58565737051793%	0.850416	1
cAMP signaling pathway	ko04024	1 out of 47 2.12765957446809%	9 out of 251 3.58565737051793%	0.850416	1
Arginine biosynthesis	ko00220	1 out of 47 2.12765957446809%	10 out of 251 3.98406374501992%	0.879467	1
Nicotinate and nicotinamide metabolism	ko00760	1 out of 47 2.12765957446809%	11 out of 251 4.38247011952191%	0.902974	1
Glutathione metabolism	ko00480	1 out of 47 2.12765957446809%	12 out of 251 4.7808764940239%	0.921975	1
Alanine, aspartate and glutamate metabolism	ko00250	1 out of 47 2.12765957446809%	12 out of 251 4.7808764940239%	0.921975	1
Neuroactive ligand-receptor interaction	ko04080	1 out of 47 2.12765957446809%	14 out of 251 5.57768924302789%	0.949697	1
Tryptophan metabolism	ko00380	1 out of 47 2.12765957446809%	14 out of 251 5.57768924302789%	0.949697	1
2-Oxocarboxylic acid metabolism	ko01210	1 out of 47 2.12765957446809%	15 out of 251 5.97609561752988%	0.959673	1
Tyrosine metabolism	ko00350	1 out of 47 2.12765957446809%	15 out of 251 5.97609561752988%	0.959673	1
Aminoacyl-tRNA biosynthesis	ko00970	1 out of 47 2.12765957446809%	20 out of 251 7.96812749003984%	0.986857	1
Protein digestion and absorption	ko04974	1 out of 47 2.12765957446809%	22 out of 251 8.76494023904382%	0.99167	1
Biosynthesis of cofactors	ko01240	3 out of 47 6.38297872340426%	42 out of 251 16.7330677290837%	0.994459	1
Central carbon metabolism in cancer	ko05230	1 out of 47 2.12765957446809%	24 out of 251 9.56175298804781%	0.994744	1
Biosynthesis of amino acids	ko01230	2 out of 47 4.25531914893617%	36 out of 251 14.3426294820717%	0.996695	1

## Sheet: Table6
name	Total Cmpd	Hits	Pvalue	FDR	foldEnrichment	hitCompound	member	reference
beta-Alanine metabolism	21	3	2.5405e-10	7.9958e-09	32.0756	Carnosine,Uracil,L-Histidine	Propanoyl-CoA; 3-Hydroxypropionyl-CoA; 3-Hydroxypropanoate; Malonyl-CoA; 3-Oxopropanoate; beta-Alanine; L-Aspartate; 1,3-Diaminopropane; 3-Aminopropanal; 3-Ureidopropionate; 5,6-Dihydrouracil; Carnosine; beta-Alanyl-N(pi)-methyl-L-histidine; Spermine; Propenoyl-CoA; Acetyl-CoA; beta-Alanyl-L-arginine; Uracil; beta-Alanyl-L-lysine; L-Histidine; Spermidine	http://www.genome.jp/kegg-bin/show_pathway?hsa00410
Histidine metabolism	16	2	3.4764e-10	7.9958e-09	31.9567	L-Histidine,Carnosine	L-Glutamate; 4-Imidazolone-5-propanoate; Urocanate; L-Histidine; Carnosine; Imidazole-4-acetaldehyde; N-Methylhistamine; Methylimidazole acetaldehyde; Histamine; N(pi)-Methyl-L-histidine; N-Formyl-L-aspartate; N-Formimino-L-glutamate; beta-Alanyl-N(pi)-methyl-L-histidine; Imidazole-4-acetate; Methylimidazoleacetic acid; L-Aspartate	http://www.genome.jp/kegg-bin/show_pathway?hsa00340
Taurine and hypotaurine metabolism	8	2	5.4416e-08	6.518e-07	23.1441	L-Cysteine,Taurine	L-Cysteate; L-Cysteine; Cysteamine; 3-Sulfino-L-alanine; Taurine; Hypotaurine; 5-L-Glutamyl-taurine; Taurocholate	http://www.genome.jp/kegg-bin/show_pathway?hsa00430
Primary bile acid biosynthesis	46	2	5.6678e-08	6.518e-07	25.2733	Glycine,Taurine	Cholesterol; Cholest-5-ene-3beta,26-diol; 25-Hydroxycholesterol; 4-Cholesten-7alpha,12alpha-diol-3-one; 7alpha-Hydroxycholest-4-en-3-one; 7alpha,12alpha-Dihydroxy-5beta-cholestan-3-one; 3alpha,7alpha,12alpha-Trihydroxy-5beta-cholestane; (25R)-3alpha,7alpha,12alpha-Trihydroxy-5beta-cholestan-26-oyl-CoA; (25S)-3alpha,7alpha,12alpha-Trihydroxy-5beta-cholestan-26-oyl-CoA; 7alpha-Hydroxy-5beta-cholest…	http://www.genome.jp/kegg-bin/show_pathway?hsa00120
Lysine degradation	25	1	2.281e-06	1.5052e-05	19.9524	L-Lysine	L-Lysine; 4-Trimethylammoniobutanoate; 4-Trimethylammoniobutanal; N6,N6,N6-Trimethyl-L-lysine; Protein N6-methyl-L-lysine; Protein lysine; Procollagen 5-hydroxy-L-lysine; Protein N6,N6-dimethyl-L-lysine; Crotonoyl-CoA; (S)-3-Hydroxybutanoyl-CoA; N6-(L-1,3-Dicarboxypropyl)-L-lysine; L-2-Aminoadipate 6-semialdehyde; L-2-Aminoadipate; 2-Oxoadipate; Acetoacetyl-CoA; Glutaryl-CoA; L-Pipecolate; 5-Phos…	http://www.genome.jp/kegg-bin/show_pathway?hsa00310
Biotin metabolism	10	1	2.281e-06	1.5052e-05	19.9524	L-Lysine	Biotin; Biotinyl-5'-AMP; Biocytin; Glutaryl-[acp] methyl ester; Malonyl-[acyl-carrier protein]; Malonyl-[acp] methyl ester; Holo-[carboxylase]; L-Lysine; 3-Ketopimeloyl-[acp] methyl ester; 3-Ketoglutaryl-[acp] methyl ester	http://www.genome.jp/kegg-bin/show_pathway?hsa00780
Aminoacyl-tRNA biosynthesis	48	16	2.5912e-06	1.5052e-05	14.4938	L-Histidine,L-Phenylalanine,L-Arginine,L-Glutamine,L-Cysteine,Glycine,L-Serine,L-Methionine,L-Valine,L-Alanine,L-Lysine,L-Isoleucine,L-Threonine,L-Tryptophan,L-Tyrosine,L-Proline	L-Asparagine; L-Histidine; L-Phenylalanine; L-Arginine; L-Glutamine; L-Cysteine; Glycine; L-Aspartate; L-Serine; L-Methionine; L-Valine; L-Alanine; L-Lysine; L-Isoleucine; L-Leucine; L-Threonine; L-Tryptophan; L-Methionyl-tRNA; 10-Formyltetrahydrofolate; L-Tyrosine; L-Proline; L-Glutamate; Glutaminyl-tRNA; L-Asparaginyl-tRNA(Asn); L-Seryl-tRNA(Sec); O-Phosphoseryl-tRNA(Sec); L-Histidyl-tRNA(His);…	http://www.genome.jp/kegg-bin/show_pathway?hsa00970
Retinol metabolism	17	1	2.6177e-06	1.5052e-05	19.7459	11-cis-Retinol	Retinol; Retinal; beta-Carotene; 11-cis-Retinal; Retinyl ester; 9-cis-Retinol; 11-cis-Retinol; Retinoate; 9-cis-Retinal; all-trans-13,14-Dihydroretinol; 11-cis-Retinyl palmitate; all-trans-4-Hydroxyretinoic acid; all-trans-18-Hydroxyretinoic acid; all-trans-5,6-Epoxyretinoic acid; 9-cis-Retinoic acid; all-trans-Retinoyl-beta-glucuronide; all-trans-3,4-Didehydroretinol	http://www.genome.jp/kegg-bin/show_pathway?hsa00830
Tryptophan metabolism	41	3	4.0937e-06	2.0924e-05	19.0727	L-Tryptophan,Tryptamine,N-Methyltryptamine	L-Tryptophan; Melatonin; N-Acetylserotonin; Serotonin; 5-Hydroxyindoleacetate; 5-Hydroxykynurenamine; 5-Hydroxykynurenine; 5-Hydroxy-L-tryptophan; L-Formylkynurenine; Acetoacetyl-CoA; (S)-3-Hydroxybutanoyl-CoA; Crotonoyl-CoA; Glutaryl-CoA; 2-Oxoadipate; 2-Aminomuconate semialdehyde; 2-Amino-3-carboxymuconate semialdehyde; 3-Hydroxyanthranilate; L-Kynurenine; Formylanthranilate; 3-Hydroxy-L-kynure…	http://www.genome.jp/kegg-bin/show_pathway?hsa00380
Valine, leucine and isoleucine biosynthesis	8	3	4.7642e-05	0.00019932	15.0786	L-Threonine,L-Isoleucine,L-Valine	L-Threonine; (S)-3-Methyl-2-oxopentanoic acid; L-Leucine; 3-Methyl-2-oxobutanoic acid; 2-Oxobutanoate; L-Isoleucine; 4-Methyl-2-oxopentanoate; L-Valine	http://www.genome.jp/kegg-bin/show_pathway?hsa00290
Valine, leucine and isoleucine degradation	40	2	4.7664e-05	0.00019932	15.0786	L-Valine,L-Isoleucine	Enzyme N6-(lipoyl)lysine; 2-Methyl-1-hydroxybutyl-ThPP; Enzyme N6-(dihydrolipoyl)lysine; 2-Methyl-1-hydroxypropyl-ThPP; 3-Methyl-1-hydroxybutyl-ThPP; Acetyl-CoA; Acetoacetyl-CoA; Acetoacetate; (S)-3-Hydroxy-3-methylglutaryl-CoA; 3-Methylcrotonyl-CoA; 3-Methylbutanoyl-CoA; Thiamin diphosphate; (S)-3-Methyl-2-oxopentanoic acid; L-Valine; 2-Methylacetoacetyl-CoA; (S)-3-Hydroxyisobutyrate; 2-Methylbu…	http://www.genome.jp/kegg-bin/show_pathway?hsa00280
Pantothenate and CoA biosynthesis	19	4	5.3841e-05	0.00020639	14.9681	Pantetheine,L-Valine,L-Cysteine,Uracil	Dephospho-CoA; Pantetheine 4'-phosphate; Pantetheine; (R)-4'-Phosphopantothenoyl-L-cysteine; N-((R)-Pantothenoyl)-L-cysteine; Pantothenate; 3-Ureidopropionate; 5,6-Dihydrouracil; L-Valine; L-Aspartate; Apo-[acyl-carrier-protein]; CoA; D-4'-Phosphopantothenate; L-Cysteine; beta-Alanine; Uracil; 3-Methyl-2-oxobutanoic acid; Adenosine 3',5'-bisphosphate; Acyl-carrier protein	http://www.genome.jp/kegg-bin/show_pathway?hsa00770
Phenylalanine metabolism	10	2	0.00019326	0.000635	10.4879	L-Phenylalanine,L-Tyrosine	Phenylacetaldehyde; L-Phenylalanine; Phenethylamine; Phenylpyruvate; Benzoyl-CoA; Phenylacetic acid; 2-Hydroxyphenylacetate; 2-Hydroxy-3-phenylpropenoate; Hippurate; L-Tyrosine	http://www.genome.jp/kegg-bin/show_pathway?hsa00360
Phenylalanine, tyrosine and tryptophan biosynthesis	4	2	0.00019326	0.000635	10.4879	L-Phenylalanine,L-Tyrosine	Phenylpyruvate; L-Phenylalanine; L-Tyrosine; 3-(4-Hydroxyphenyl)pyruvate	http://www.genome.jp/kegg-bin/show_pathway?hsa00400
Pyrimidine metabolism	39	4	0.0018927	0.0058044	8.47131	L-Glutamine,Uridine,Cytidine,Uracil	UDP; L-Glutamine; Carbamoyl phosphate; (S)-Dihydroorotate; Orotidine 5'-phosphate; UMP; UTP; Uridine; 5,6-Dihydrouracil; 3-Ureidopropionate; CTP; CDP; CMP; Cytidine; dCDP; dCMP; dCTP; Deoxycytidine; dUTP; dUDP; dUMP; Deoxyuridine; dTDP; dTTP; dTMP; Thymidine; Thymine; (R)-5,6-Dihydrothymine; (R)-3-Ureidoisobutyrate; P1,P4-Bis(5'-uridyl) tetraphosphate; 2'-Deoxy-5-hydroxymethylcytidine-5'-diphosph…	http://www.genome.jp/kegg-bin/show_pathway?hsa00240
Glycerophospholipid metabolism	36	2	0.0022179	0.0063764	8.10557	Choline,Acetylcholine	Phosphatidylethanolamine; Phosphatidylcholine; Glycerone phosphate; 1-Acyl-sn-glycero-3-phosphocholine; CDP-choline; 1,2-Diacyl-sn-glycerol; Choline phosphate; Choline; Acetylcholine; Ethanolamine phosphate; Ethanolamine; Phosphatidate; Phosphatidylserine; 1-Acyl-sn-glycerol 3-phosphate; CDP-diacylglycerol; sn-Glycerol 3-phosphate; sn-Glycero-3-phosphocholine; CDP-ethanolamine; 1-Acyl-sn-glycero-…	http://www.genome.jp/kegg-bin/show_pathway?hsa00564
Sphingolipid metabolism	21	1	0.0044321	0.011519	7.85542	L-Serine	Dihydroceramide; Ceramide 1-phosphate; Sphingosine 1-phosphate; Sphinganine 1-phosphate; Phytoceramide; Sphinganine; Sphingomyelin; Sphingosine; N-Acylsphingosine; L-Serine; Palmitoyl-CoA; 3-Dehydrosphinganine; Digalactosylceramide; Galactosylceramide; GM4; Lactosylceramide; Glucosylceramide; Sulfatide; Phytosphingosine; Digalactosylceramide sulfate; Ethanolamine phosphate	http://www.genome.jp/kegg-bin/show_pathway?hsa00600
Alanine, aspartate and glutamate metabolism	28	2	0.0045073	0.011519	5.82422	L-Alanine,L-Glutamine	N-Acetyl-L-aspartate; 2-Oxosuccinamate; L-Aspartate; L-Asparagine; D-Aspartate; N-(L-Arginino)succinate; N6-(1,2-Dicarboxyethyl)-AMP; L-Alanine; Succinate semialdehyde; L-Glutamate; 4-Aminobutanoate; L-Glutamine; Ammonia; 2-Oxoglutaramate; (S)-1-Pyrroline-5-carboxylate; N-Acetylaspartylglutamate; N-Acetylaspartylglutamylglutamate; Citrate; Oxaloacetate; Fumarate; Pyruvate; N-Carbamoyl-L-aspartate…	http://www.genome.jp/kegg-bin/show_pathway?hsa00250
Caffeine metabolism	10	6	0.0062912	0.015231	6.29817	1-Methylxanthine,Theobromine,7-Methylxanthine,1-Methyluric acid,1,7-Dimethyluric acid,7-Methyluric acid	1,7-Dimethylxanthine; 1-Methylxanthine; Theobromine; 7-Methylxanthine; Caffeine; 1-Methyluric acid; 3,7-Dimethyluric acid; 1,7-Dimethyluric acid; 5-Acetylamino-6-formylamino-3-methyluracil; 7-Methyluric acid	http://www.genome.jp/kegg-bin/show_pathway?hsa00232
Drug metabolism - other enzymes	39	1	0.006683	0.015371	7.16745	Isonicotinic acid	Mercaptopurine (INN); 6-Thioinosine-5'-monophosphate; 6-Thioguanosine monophosphate; 6-Methylmercaptopurine; Tioguanine (INN); 6-Thioxanthine 5'-monophosphate; 6-Mercaptopurine ribonucleoside triphosphate; Isoniazid (JP17/USP/INN); Acetylhydrazine; Fluorouracil (JP17/USP/INN); 5,6-Dihydro-5-fluorouracil; alpha-Fluoro-beta-ureidopropionic acid; 5-Fluorouridine; Floxuridine (USP/INN); Tegafur (JP17…	http://www.genome.jp/kegg-bin/show_pathway?hsa00983
Selenocompound metabolism	20	1	0.010401	0.02264	6.42626	L-Alanine	Selenite; Hydrogen selenide; L-Selenocysteine; L-Selenomethionine; Se-Methyl-L-selenocysteine; O-Phosphoseryl-tRNA(Sec); Selenophosphoric acid; L-Seryl-tRNA(Sec); Selenate; L-Selenocystathionine; Selenohomocysteine; Methylselenic acid; Dimethyl selenide; L-Alanine; Selenomethionyl-tRNA(Met); Methaneselenol; Methylselenopyruvate; L-Selenocysteinyl-tRNA(Sec); Adenylylselenate; Trimethylselenonium	http://www.genome.jp/kegg-bin/show_pathway?hsa00450
Glyoxylate and dicarboxylate metabolism	32	3	0.010828	0.02264	5.6861	L-Serine,Glycine,L-Glutamine	Hydroxypyruvate; cis-Aconitate; 4-Hydroxy-2-oxoglutarate; N-Formylderivatives; Glycolate; Citrate; (S)-Malate; 2-Phosphoglycolate; Acetyl-CoA; (S)-Methylmalonyl-CoA; Propanoyl-CoA; (R)-Methylmalonyl-CoA; Glyoxylate; L-Serine; Glycine; Hydrogen peroxide; L-Glutamate; (2S)-Ethylmalonyl-CoA; D-Glycerate; Acetate; 2-Hydroxy-3-oxopropanoate; Isocitrate; Pyruvate; Formate; Oxaloacetate; Acetoacetyl-CoA…	http://www.genome.jp/kegg-bin/show_pathway?hsa00630
Arginine and proline metabolism	38	6	0.016116	0.032232	5.68525	L-Arginine,Creatine,L-Proline,cis-4-Hydroxy-D-proline,Phosphocreatine,1-Pyrroline-4-hydroxy-2-carboxylate	L-Arginine; N(omega)-Hydroxyarginine; Guanidinoacetate; Creatine; 4-Aminobutanoate; Agmatine; Putrescine; 4-Aminobutyraldehyde; S-Adenosylmethioninamine; S-Adenosyl-L-methionine; Spermidine; N-Acetylputrescine; N4-Acetylaminobutanal; Spermine; trans-3-Hydroxy-L-proline; D-Proline; (4R)-4-Hydroxy-2-oxoglutarate; L-erythro-4-Hydroxyglutamate; L-4-Hydroxyglutamate semialdehyde; L-1-Pyrroline-3-hydro…	http://www.genome.jp/kegg-bin/show_pathway?hsa00330
D-Glutamine and D-glutamate metabolism	6	1	0.02	0.0368	5.33396	L-Glutamine	D-Glutamate; L-Glutamate; D-Glutamine; L-Glutamine; 5-Oxo-D-proline; 2-Oxoglutarate	http://www.genome.jp/kegg-bin/show_pathway?hsa00471
Nitrogen metabolism	6	1	0.02	0.0368	5.33396	L-Glutamine	CO2; Ammonia; L-Glutamate; HCO3-; Carbamoyl phosphate; L-Glutamine	http://www.genome.jp/kegg-bin/show_pathway?hsa00910
Starch and sucrose metabolism	18	2	0.022093	0.039087	5.16736	D-Fructose,D-Glucose	Cellodextrin; Cellobiose; D-Fructose; Sucrose; beta-D-Glucoside; UDP-glucose; D-Glucose 1-phosphate; D-Glucose 6-phosphate; D-Glucose; Amylose; alpha,alpha-Trehalose; Maltodextrin; Starch; Maltose; Dextrin; Isomaltose; D-Fructose 6-phosphate; alpha-D-Glucose 1,6-bisphosphate	http://www.genome.jp/kegg-bin/show_pathway?hsa00500
Fructose and mannose metabolism	20	2	0.031023	0.052853	4.34892	D-Fructose,D-Mannose	D-Sorbitol; D-Fructose; D-Mannose; beta-D-Fructose 2,6-bisphosphate; D-Mannose 6-phosphate; L-Fucose 1-phosphate; GDP-4-dehydro-6-deoxy-D-mannose; GDP-mannose; D-Mannose 1-phosphate; beta-D-Fructose 6-phosphate; D-Glyceraldehyde 3-phosphate; D-Fructose 1-phosphate; D-Glyceraldehyde; beta-D-Fructose 1,6-bisphosphate; 6-Deoxy-L-galactose; L-Fuconate; alpha-D-Glucose; GDP-L-fucose; Glycerone phospha…	http://www.genome.jp/kegg-bin/show_pathway?hsa00051
Galactose metabolism	27	5	0.032869	0.053999	4.20926	D-Glucose,D-Fructose,Galactitol,D-Mannose,myo-Inositol	Stachyose; D-Tagatose 6-phosphate; D-Gal alpha 1->6D-Gal alpha 1->6D-Glucose; Sucrose; Raffinose; Melibiose; D-Galactose; 3-beta-D-Galactosyl-sn-glycerol; Epimelibiose; Melibiitol; alpha-D-Galactosyl-(1->3)-1D-myo-inositol; alpha-D-Glucose; Lactose; D-Glucose 1-phosphate; UDP-alpha-D-galactose; UDP-glucose; alpha-D-Galactose 1-phosphate; alpha-D-Galactose; alpha-D-Glucose 6-phosphate; D-Tagatose …	http://www.genome.jp/kegg-bin/show_pathway?hsa00052
Steroid biosynthesis	42	1	0.038748	0.061462	4.23901	Calcitriol	Vitamin D3; Delta7-Avenasterol; Zymosterol; Calcidiol; 7-Dehydrocholesterol; Lathosterol; 5alpha-Cholest-8-en-3beta-ol; Episterol; 24-Methylenecholesterol; 5-Dehydroepisterol; Cholesterol; 7-Dehydrodesmosterol; 14-Demethyllanosterol; Isofucosterol; Obtusifoliol; 4alpha-Methyl-5alpha-ergosta-8,14,24(28)-trien-3beta-ol; 5-Dehydroavenasterol; (S)-2,3-Epoxysqualene; 4,4-Dimethyl-5alpha-cholesta-8,14,…	http://www.genome.jp/kegg-bin/show_pathway?hsa00100
Amino sugar and nucleotide sugar metabolism	37	2	0.060201	0.092308	3.5201	N-Acetyl-D-glucosamine,D-Mannose	N-Acetyl-D-glucosamine; N-Acetyl-D-glucosamine 6-phosphate; N-Acetyl-alpha-D-glucosamine 1-phosphate; UDP-N-acetyl-alpha-D-glucosamine; N-Acetyl-D-mannosamine; N-Acetylneuraminate 9-phosphate; N-Acetylneuraminate; alpha-D-Galactose 1-phosphate; UDP-glucose; D-Glucose 1-phosphate; UDP-glucuronate; D-Glucosamine 6-phosphate; D-Mannose 6-phosphate; GDP-mannose; D-Fructose 6-phosphate; alpha-D-Glucos…	http://www.genome.jp/kegg-bin/show_pathway?hsa00520
alpha-Linolenic acid metabolism	13	1	0.082593	0.12256	3.01241	Stearidonic acid	OPC4-CoA; OPC6-CoA; 3-Oxo-OPC4-CoA; 3-Oxo-OPC6-CoA; 3-Oxo-OPC8-CoA; OPC8-CoA; Phosphatidylcholine; (9Z,12Z,15Z)-Octadecatrienoic acid; trans-2-Enoyl-OPC4-CoA; trans-2-Enoyl-OPC6-CoA; (+)-7-Isojasmonic acid CoA; trans-2-Enoyl-OPC8-CoA; Stearidonic acid	http://www.genome.jp/kegg-bin/show_pathway?hsa00592
Ubiquinone and other terpenoid-quinone biosynthesis	9	1	0.10406	0.14525	2.64743	L-Tyrosine	3-(4-Hydroxyphenyl)pyruvate; L-Tyrosine; Menaquinone; 2,3-Epoxymenaquinone; Phylloquinol; Phylloquinone; Menaquinol; Vitamin K1 epoxide; Homogentisate	http://www.genome.jp/kegg-bin/show_pathway?hsa00130
Tyrosine metabolism	42	3	0.1042	0.14525	2.63825	L-Tyrosine,Dopaquinone,Thyroxine	L-Dopachrome; L-Normetanephrine; 3-Methoxy-4-hydroxyphenylglycolaldehyde; L-Noradrenaline; L-Adrenaline; 3,4-Dihydroxymandelate; 3,4-Dihydroxymandelaldehyde; 3,4-Dihydroxyphenylethyleneglycol; L-Metanephrine; Dopamine; 3,4-Dihydroxyphenylacetaldehyde; 3,4-Dihydroxyphenylacetate; 3-Methoxy-4-hydroxyphenylacetaldehyde; 3-Methoxytyramine; 3,4-Dihydroxy-L-phenylalanine; 3,5-Diiodo-L-tyrosine; 3-Iodo-…	http://www.genome.jp/kegg-bin/show_pathway?hsa00350
Neomycin, kanamycin and gentamicin biosynthesis	2	1	0.1289	0.17439	2.31492	D-Glucose	D-Glucose; D-Glucose 6-phosphate	http://www.genome.jp/kegg-bin/show_pathway?hsa00524
Purine metabolism	65	9	0.17104	0.22479	1.82201	Xanthine,L-Glutamine,Adenosine,Deoxyinosine,Xanthosine,Hypoxanthine,Inosine,Adenine,Urea	GDP; Xanthine; D-Ribose 5-phosphate; L-Glutamine; 5-Phospho-alpha-D-ribose 1-diphosphate; 5-Phosphoribosylamine; 5'-Phosphoribosylglycinamide; 2-(Formamido)-N1-(5'-phosphoribosyl)acetamidine; 1-(5'-Phosphoribosyl)-5-amino-4-imidazolecarboxamide; 1-(5'-Phosphoribosyl)-5-amino-4-(N-succinocarboxamide)-imidazole; 1-(5-Phospho-D-ribosyl)-5-amino-4-imidazolecarboxylate; 1-(5'-Phosphoribosyl)-5-formami…	http://www.genome.jp/kegg-bin/show_pathway?hsa00230
Glutathione metabolism	28	3	0.24337	0.30258	1.37382	Glutathione,Glycine,L-Cysteine	R-S-Cysteinylglycine; R-S-Glutathione; Glutathione; NADP+; Glutathione disulfide; NADPH; Glycine; gamma-L-Glutamyl-L-cysteine; L-Glutamate; L-Cysteine; Cys-Gly; 5-Oxoproline; L-Amino acid; (5-L-Glutamyl)-L-amino acid; S-Substituted L-cysteine; Acetyl-CoA; RX; L-Ornithine; Putrescine; Spermidine; Cadaverine; Tryparedoxin; Trypanothione; S-Substituted N-acetyl-L-cysteine; Spermine; Aminopropylcadav…	http://www.genome.jp/kegg-bin/show_pathway?hsa00480
Thiamine metabolism	7	1	0.24338	0.30258	1.37408	L-Cysteine	[Enzyme]-cysteine; L-Cysteine; Thiamine; Thiamin triphosphate; Thiamin diphosphate; Thiamin monophosphate; [Enzyme]-S-sulfanylcysteine	http://www.genome.jp/kegg-bin/show_pathway?hsa00730
Cysteine and methionine metabolism	33	4	0.30779	0.37259	1.18419	L-Serine,L-Methionine,L-Cystine,L-Cysteine	4-Methylthio-2-oxobutanoic acid; 1,2-Dihydroxy-5-(methylthio)pent-1-en-3-one; S-Methyl-5-thio-D-ribulose 1-phosphate; S-Methyl-5-thio-D-ribose 1-phosphate; 5'-Methylthioadenosine; S-Adenosylmethioninamine; S-Adenosyl-L-methionine; L-Cystathionine; L-Serine; L-Homocysteine; L-Methionine; S-Adenosyl-L-homocysteine; 2,3-Diketo-5-methylthiopentyl-1-phosphate; L-Cysteate; L-Cystine; L-Cysteine; 3-Sulf…	http://www.genome.jp/kegg-bin/show_pathway?hsa00270
Arginine biosynthesis	14	4	0.31873	0.37369	1.00595	L-Arginine,N-Acetylornithine,L-Glutamine,Urea	L-Glutamate; L-Arginine; N-Acetylornithine; N-(L-Arginino)succinate; L-Citrulline; L-Aspartate; Carbamoyl phosphate; L-Ornithine; Ammonia; L-Glutamine; 2-Oxoglutarate; N-Acetyl-L-glutamate; Urea; Fumarate	http://www.genome.jp/kegg-bin/show_pathway?hsa00220
Ascorbate and aldarate metabolism	8	1	0.34805	0.37369	0.891628	myo-Inositol	myo-Inositol; UDP-glucose; L-Gulono-1,4-lactone; D-Glucuronolactone; UDP-glucuronate; D-Glucuronate; L-Gulonate; D-Glucarate	http://www.genome.jp/kegg-bin/show_pathway?hsa00053
Inositol phosphate metabolism	30	1	0.34805	0.37369	0.891628	myo-Inositol	1-Phosphatidyl-1D-myo-inositol 5-phosphate; 1-Phosphatidyl-D-myo-inositol 4,5-bisphosphate; D-myo-Inositol 1,4,5-trisphosphate; 1D-myo-Inositol 1,4,5,6-tetrakisphosphate; Phosphatidylinositol-3,4,5-trisphosphate; 1D-myo-Inositol 1,3,4,5-tetrakisphosphate; 1D-myo-Inositol 1,3,4-trisphosphate; 1D-myo-Inositol 1,3,4,6-tetrakisphosphate; 1D-myo-Inositol 3,4,5,6-tetrakisphosphate; 1D-myo-Inositol 1,4-…	http://www.genome.jp/kegg-bin/show_pathway?hsa00562
Phosphatidylinositol signaling system	28	1	0.34805	0.37369	0.891628	myo-Inositol	1-Phosphatidyl-1D-myo-inositol 3-phosphate; 1D-myo-Inositol 1,3,4,5,6-pentakisphosphate; 1-Phosphatidyl-D-myo-inositol; 1-Phosphatidyl-D-myo-inositol 4,5-bisphosphate; myo-Inositol; CDP-diacylglycerol; 1-Phosphatidyl-1D-myo-inositol 4-phosphate; Phosphatidate; 1,2-Diacyl-sn-glycerol; 1-Phosphatidyl-1D-myo-inositol 3,4-bisphosphate; 1-Phosphatidyl-1D-myo-inositol 5-phosphate; 1D-myo-Inositol 1,3,4…	http://www.genome.jp/kegg-bin/show_pathway?hsa04070
Glycine, serine and threonine metabolism	33	8	0.34932	0.37369	0.889078	L-Serine,Choline,Betaine,Glycine,Sarcosine,L-Threonine,Creatine,L-Cysteine	L-Serine; Choline; Betaine aldehyde; Betaine; Guanidinoacetate; 3-Phospho-D-glycerate; N,N-Dimethylglycine; L-Cystathionine; Glycine; O-Phospho-L-serine; Sarcosine; 5,10-Methylenetetrahydrofolate; L-Threonine; Lipoylprotein; Aminoacetone; D-Glycerate; [Protein]-S8-aminomethyldihydrolipoyllysine; Tetrahydrofolate; Dihydrolipoylprotein; 2-Phospho-D-glycerate; D-Serine; Hydroxypyruvate; Creatine; 3-…	http://www.genome.jp/kegg-bin/show_pathway?hsa00260
Porphyrin and chlorophyll metabolism	30	4	0.59513	0.62218	0.423026	Glycine,Biliverdin,Porphobilinogen,D-Urobilinogen	Cobinamide; Heme O; Heme; Glycine; Bilirubin beta-diglucuronide; Cob(I)yrinate a,c diamide; Fe2+; Biliverdin; Cob(I)alamin; Protoporphyrinogen IX; Coproporphyrinogen III; Uroporphyrinogen III; Hydroxymethylbilane; Porphobilinogen; 5-Aminolevulinate; Uroporphyrinogen I; L-Glutamate; Bilirubin; Protoporphyrin; Coproporphyrin III; Adenosyl cobinamide; Heme A; D-Urobilinogen; Adenosyl cobyrinate a,c …	http://www.genome.jp/kegg-bin/show_pathway?hsa00860
Riboflavin metabolism	4	1	0.75682	0.77363	0.0975521	Riboflavin	Riboflavin; FMN; FAD; Reduced riboflavin	http://www.genome.jp/kegg-bin/show_pathway?hsa00740
Steroid hormone biosynthesis	85	2	0.8231	0.8231	0.0514441	Aldosterone,Cortisol	Cholesterol; 20alpha,22beta-Dihydroxycholesterol; 20alpha-Hydroxycholesterol; 17alpha,20alpha-Dihydroxycholesterol; Pregnenolone; 21-Hydroxypregnenolone; 17alpha-Hydroxypregnenolone; 17alpha,21-Dihydroxypregnenolone; 11beta,17alpha,21-Trihydroxypregnenolone; Dehydroepiandrosterone; Dehydroepiandrosterone sulfate; 16alpha-Hydroxydehydroepiandrosterone; Androstenediol; 11-Deoxycorticosterone; 5alph…	http://www.genome.jp/kegg-bin/show_pathway?hsa00140

## Sheet: Table7
Ta	ko_id	Cluter_frequency	Genome_frequency	P-value	FDR
Phospholipase D signaling pathway	ko04072	2 out of 12 16.6666666666667%	2 out of 251 0.796812749003984%	0.00210359	0.14094
Pancreatic cancer	ko05212	1 out of 12 8.33333333333333%	1 out of 251 0.398406374501992%	0.0478088	1
Spinocerebellar ataxia	ko05017	1 out of 12 8.33333333333333%	1 out of 251 0.398406374501992%	0.0478088	1
Circadian entrainment	ko04713	1 out of 12 8.33333333333333%	1 out of 251 0.398406374501992%	0.0478088	1
Long-term potentiation	ko04720	1 out of 12 8.33333333333333%	1 out of 251 0.398406374501992%	0.0478088	1
Fat digestion and absorption	ko04975	1 out of 12 8.33333333333333%	1 out of 251 0.398406374501992%	0.0478088	1
Glycerolipid metabolism	ko00561	1 out of 12 8.33333333333333%	1 out of 251 0.398406374501992%	0.0478088	1
Huntington disease	ko05016	1 out of 12 8.33333333333333%	1 out of 251 0.398406374501992%	0.0478088	1
cAMP signaling pathway	ko04024	2 out of 12 16.6666666666667%	9 out of 251 3.58565737051793%	0.0626462	1
Porphyrin and chlorophyll metabolism	ko00860	2 out of 12 16.6666666666667%	9 out of 251 3.58565737051793%	0.0626462	1
Glutamatergic synapse	ko04724	1 out of 12 8.33333333333333%	2 out of 251 0.796812749003984%	0.0935139	1
Pathways in cancer	ko05200	1 out of 12 8.33333333333333%	2 out of 251 0.796812749003984%	0.0935139	1
Gap junction	ko04540	1 out of 12 8.33333333333333%	2 out of 251 0.796812749003984%	0.0935139	1
Neomycin, kanamycin and gentamicin biosynthesis	ko00524	1 out of 12 8.33333333333333%	2 out of 251 0.796812749003984%	0.0935139	1
Retrograde endocannabinoid signaling	ko04723	1 out of 12 8.33333333333333%	2 out of 251 0.796812749003984%	0.0935139	1
GnRH signaling pathway	ko04912	1 out of 12 8.33333333333333%	2 out of 251 0.796812749003984%	0.0935139	1
Long-term depression	ko04730	1 out of 12 8.33333333333333%	2 out of 251 0.796812749003984%	0.0935139	1
Amyotrophic lateral sclerosis	ko05014	1 out of 12 8.33333333333333%	2 out of 251 0.796812749003984%	0.0935139	1
Fc gamma R-mediated phagocytosis	ko04666	1 out of 12 8.33333333333333%	2 out of 251 0.796812749003984%	0.0935139	1
Cocaine addiction	ko05030	1 out of 12 8.33333333333333%	2 out of 251 0.796812749003984%	0.0935139	1
Nicotine addiction	ko05033	1 out of 12 8.33333333333333%	2 out of 251 0.796812749003984%	0.0935139	1
Amphetamine addiction	ko05031	1 out of 12 8.33333333333333%	2 out of 251 0.796812749003984%	0.0935139	1
Phosphatidylinositol signaling system	ko04070	1 out of 12 8.33333333333333%	2 out of 251 0.796812749003984%	0.0935139	1
Glutathione metabolism	ko00480	2 out of 12 16.6666666666667%	12 out of 251 4.7808764940239%	0.105916	1
Nitrogen metabolism	ko00910	1 out of 12 8.33333333333333%	3 out of 251 1.19521912350598%	0.1372	1
D-Glutamine and D-glutamate metabolism	ko00471	1 out of 12 8.33333333333333%	3 out of 251 1.19521912350598%	0.1372	1
FoxO signaling pathway	ko04068	1 out of 12 8.33333333333333%	3 out of 251 1.19521912350598%	0.1372	1
Alcoholism	ko05034	1 out of 12 8.33333333333333%	3 out of 251 1.19521912350598%	0.1372	1
Drug metabolism - other enzymes	ko00983	1 out of 12 8.33333333333333%	3 out of 251 1.19521912350598%	0.1372	1
Riboflavin metabolism	ko00740	1 out of 12 8.33333333333333%	4 out of 251 1.59362549800797%	0.178948	1
Choline metabolism in cancer	ko05231	1 out of 12 8.33333333333333%	4 out of 251 1.59362549800797%	0.178948	1
Synaptic vesicle cycle	ko04721	1 out of 12 8.33333333333333%	4 out of 251 1.59362549800797%	0.178948	1
GABAergic synapse	ko04727	1 out of 12 8.33333333333333%	4 out of 251 1.59362549800797%	0.178948	1
Pathways of neurodegeneration - multiple diseases	ko05022	1 out of 12 8.33333333333333%	4 out of 251 1.59362549800797%	0.178948	1
Arginine and proline metabolism	ko00330	2 out of 12 16.6666666666667%	18 out of 251 7.17131474103586%	0.208966	1
Pyruvate metabolism	ko00620	1 out of 12 8.33333333333333%	5 out of 251 1.99203187250996%	0.218838	1
Proximal tubule bicarbonate reclamation	ko04964	1 out of 12 8.33333333333333%	5 out of 251 1.99203187250996%	0.218838	1
Vitamin digestion and absorption	ko04977	1 out of 12 8.33333333333333%	5 out of 251 1.99203187250996%	0.218838	1
Glycolysis / Gluconeogenesis	ko00010	1 out of 12 8.33333333333333%	5 out of 251 1.99203187250996%	0.218838	1
HIF-1 signaling pathway	ko04066	1 out of 12 8.33333333333333%	5 out of 251 1.99203187250996%	0.218838	1
Fructose and mannose metabolism	ko00051	1 out of 12 8.33333333333333%	5 out of 251 1.99203187250996%	0.218838	1
Taste transduction	ko04742	1 out of 12 8.33333333333333%	6 out of 251 2.39043824701195%	0.256943	1
Taurine and hypotaurine metabolism	ko00430	1 out of 12 8.33333333333333%	6 out of 251 2.39043824701195%	0.256943	1
Propanoate metabolism	ko00640	1 out of 12 8.33333333333333%	6 out of 251 2.39043824701195%	0.256943	1
Butanoate metabolism	ko00650	1 out of 12 8.33333333333333%	7 out of 251 2.78884462151394%	0.293338	1
Glycerophospholipid metabolism	ko00564	1 out of 12 8.33333333333333%	7 out of 251 2.78884462151394%	0.293338	1
Glucagon signaling pathway	ko04922	1 out of 12 8.33333333333333%	7 out of 251 2.78884462151394%	0.293338	1
Ferroptosis	ko04216	1 out of 12 8.33333333333333%	7 out of 251 2.78884462151394%	0.293338	1
Central carbon metabolism in cancer	ko05230	2 out of 12 16.6666666666667%	24 out of 251 9.56175298804781%	0.321225	1
Biosynthesis of cofactors	ko01240	3 out of 12 25%	42 out of 251 16.7330677290837%	0.323726	1
Caffeine metabolism	ko00232	1 out of 12 8.33333333333333%	9 out of 251 3.58565737051793%	0.361272	1
Histidine metabolism	ko00340	1 out of 12 8.33333333333333%	9 out of 251 3.58565737051793%	0.361272	1
Glyoxylate and dicarboxylate metabolism	ko00630	1 out of 12 8.33333333333333%	9 out of 251 3.58565737051793%	0.361272	1
Arginine biosynthesis	ko00220	1 out of 12 8.33333333333333%	10 out of 251 3.98406374501992%	0.392945	1
Metabolic pathways	ko01100	11 out of 12 91.6666666666667%	211 out of 251 84.0637450199203%	0.402145	1
Nicotinate and nicotinamide metabolism	ko00760	1 out of 12 8.33333333333333%	11 out of 251 4.38247011952191%	0.423171	1
Alanine, aspartate and glutamate metabolism	ko00250	1 out of 12 8.33333333333333%	12 out of 251 4.7808764940239%	0.452013	1
Neuroactive ligand-receptor interaction	ko04080	1 out of 12 8.33333333333333%	14 out of 251 5.57768924302789%	0.505769	1
Tryptophan metabolism	ko00380	1 out of 12 8.33333333333333%	14 out of 251 5.57768924302789%	0.505769	1
Carbon metabolism	ko01200	1 out of 12 8.33333333333333%	15 out of 251 5.97609561752988%	0.530794	1
2-Oxocarboxylic acid metabolism	ko01210	1 out of 12 8.33333333333333%	15 out of 251 5.97609561752988%	0.530794	1
Purine metabolism	ko00230	1 out of 12 8.33333333333333%	15 out of 251 5.97609561752988%	0.530794	1
Pyrimidine metabolism	ko00240	1 out of 12 8.33333333333333%	19 out of 251 7.56972111553785%	0.619714	1
Aminoacyl-tRNA biosynthesis	ko00970	1 out of 12 8.33333333333333%	20 out of 251 7.96812749003984%	0.639384	1
Protein digestion and absorption	ko04974	1 out of 12 8.33333333333333%	22 out of 251 8.76494023904382%	0.675955	1
Biosynthesis of amino acids	ko01230	1 out of 12 8.33333333333333%	36 out of 251 14.3426294820717%	0.850927	1
ABC transporters	ko02010	1 out of 12 8.33333333333333%	41 out of 251 16.3346613545817%	0.888449	1

## Sheet: Table8
#Kegg_pathway	ko_id	Cluter_frequency	Genome_frequency	P-value	FDR
Fatty acid biosynthesis	ko00061	1 out of 4 25%	5 out of 251 1.99203187250996%	0.0777843	0.388921
Nicotinate and nicotinamide metabolism	ko00760	1 out of 4 25%	11 out of 251 4.38247011952191%	0.165032	0.825161
Tyrosine metabolism	ko00350	1 out of 4 25%	15 out of 251 5.97609561752988%	0.219655	1
Cysteine and methionine metabolism	ko00270	1 out of 4 25%	16 out of 251 6.37450199203187%	0.232881	1
Metabolic pathways	ko01100	2 out of 4 50%	211 out of 251 84.0637450199203%	0.986522	1

## Sheet: Table9
#Kegg_pathway	ko_id	Cluter_frequency	Genome_frequency	P-value	FDR
Arachidonic acid metabolism	ko00590	4 out of 21 19.047619047619%	5 out of 251 1.99203187250996%	0.00017514	0.0133106
Serotonergic synapse	ko04726	3 out of 21 14.2857142857143%	4 out of 251 1.59362549800797%	0.00193171	0.14681
Purine metabolism	ko00230	5 out of 21 23.8095238095238%	15 out of 251 5.97609561752988%	0.00436868	0.332019
Aldosterone synthesis and secretion	ko04925	2 out of 21 9.52380952380952%	4 out of 251 1.59362549800797%	0.0361847	1
Primary bile acid biosynthesis	ko00120	2 out of 21 9.52380952380952%	4 out of 251 1.59362549800797%	0.0361847	1
Regulation of lipolysis in adipocytes	ko04923	2 out of 21 9.52380952380952%	5 out of 251 1.99203187250996%	0.0572635	1
Taurine and hypotaurine metabolism	ko00430	2 out of 21 9.52380952380952%	6 out of 251 2.39043824701195%	0.081577	1
Leishmaniasis	ko05140	1 out of 21 4.76190476190476%	1 out of 251 0.398406374501992%	0.0836653	1
Platelet activation	ko04611	1 out of 21 4.76190476190476%	1 out of 251 0.398406374501992%	0.0836653	1
Olfactory transduction	ko04740	1 out of 21 4.76190476190476%	1 out of 251 0.398406374501992%	0.0836653	1
Ovarian steroidogenesis	ko04913	1 out of 21 4.76190476190476%	1 out of 251 0.398406374501992%	0.0836653	1
Inflammatory mediator regulation of TRP channels	ko04750	1 out of 21 4.76190476190476%	1 out of 251 0.398406374501992%	0.0836653	1
PI3K-Akt signaling pathway	ko04151	1 out of 21 4.76190476190476%	1 out of 251 0.398406374501992%	0.0836653	1
Necroptosis	ko04217	1 out of 21 4.76190476190476%	1 out of 251 0.398406374501992%	0.0836653	1
Longevity regulating pathway	ko04211	1 out of 21 4.76190476190476%	1 out of 251 0.398406374501992%	0.0836653	1
Ether lipid metabolism	ko00565	1 out of 21 4.76190476190476%	1 out of 251 0.398406374501992%	0.0836653	1
Oxytocin signaling pathway	ko04921	1 out of 21 4.76190476190476%	1 out of 251 0.398406374501992%	0.0836653	1
Glycosylphosphatidylinositol (GPI)-anchor biosynthesis	ko00563	1 out of 21 4.76190476190476%	1 out of 251 0.398406374501992%	0.0836653	1
Glycerophospholipid metabolism	ko00564	2 out of 21 9.52380952380952%	7 out of 251 2.78884462151394%	0.10849	1
Bile secretion	ko04976	3 out of 21 14.2857142857143%	15 out of 251 5.97609561752988%	0.119154	1
Linoleic acid metabolism	ko00591	2 out of 21 9.52380952380952%	8 out of 251 3.18725099601594%	0.137445	1
Parathyroid hormone synthesis, secretion and action	ko04928	1 out of 21 4.76190476190476%	2 out of 251 0.796812749003984%	0.160637	1
Folate biosynthesis	ko00790	1 out of 21 4.76190476190476%	2 out of 251 0.796812749003984%	0.160637	1
Cholesterol metabolism	ko04979	1 out of 21 4.76190476190476%	2 out of 251 0.796812749003984%	0.160637	1
Fc epsilon RI signaling pathway	ko04664	1 out of 21 4.76190476190476%	2 out of 251 0.796812749003984%	0.160637	1
Retrograde endocannabinoid signaling	ko04723	1 out of 21 4.76190476190476%	2 out of 251 0.796812749003984%	0.160637	1
Morphine addiction	ko05032	1 out of 21 4.76190476190476%	2 out of 251 0.796812749003984%	0.160637	1
Fc gamma R-mediated phagocytosis	ko04666	1 out of 21 4.76190476190476%	2 out of 251 0.796812749003984%	0.160637	1
Sphingolipid metabolism	ko00600	1 out of 21 4.76190476190476%	2 out of 251 0.796812749003984%	0.160637	1
cGMP-PKG signaling pathway	ko04022	1 out of 21 4.76190476190476%	2 out of 251 0.796812749003984%	0.160637	1
Amoebiasis	ko05146	1 out of 21 4.76190476190476%	2 out of 251 0.796812749003984%	0.160637	1
Long-term depression	ko04730	1 out of 21 4.76190476190476%	2 out of 251 0.796812749003984%	0.160637	1
mTOR signaling pathway	ko04150	1 out of 21 4.76190476190476%	2 out of 251 0.796812749003984%	0.160637	1
GnRH signaling pathway	ko04912	1 out of 21 4.76190476190476%	2 out of 251 0.796812749003984%	0.160637	1
Cushing syndrome	ko04934	1 out of 21 4.76190476190476%	2 out of 251 0.796812749003984%	0.160637	1
Cortisol synthesis and secretion	ko04927	1 out of 21 4.76190476190476%	2 out of 251 0.796812749003984%	0.160637	1
D-Glutamine and D-glutamate metabolism	ko00471	1 out of 21 4.76190476190476%	3 out of 251 1.19521912350598%	0.231427	1
AMPK signaling pathway	ko04152	1 out of 21 4.76190476190476%	3 out of 251 1.19521912350598%	0.231427	1
Vascular smooth muscle contraction	ko04270	1 out of 21 4.76190476190476%	3 out of 251 1.19521912350598%	0.231427	1
Sphingolipid signaling pathway	ko04071	1 out of 21 4.76190476190476%	3 out of 251 1.19521912350598%	0.231427	1
Antifolate resistance	ko01523	1 out of 21 4.76190476190476%	3 out of 251 1.19521912350598%	0.231427	1
Nitrogen metabolism	ko00910	1 out of 21 4.76190476190476%	3 out of 251 1.19521912350598%	0.231427	1
Parkinson disease	ko05012	1 out of 21 4.76190476190476%	3 out of 251 1.19521912350598%	0.231427	1
FoxO signaling pathway	ko04068	1 out of 21 4.76190476190476%	3 out of 251 1.19521912350598%	0.231427	1
Pentose and glucuronate interconversions	ko00040	1 out of 21 4.76190476190476%	4 out of 251 1.59362549800797%	0.296508	1
Pathways of neurodegeneration - multiple diseases	ko05022	1 out of 21 4.76190476190476%	4 out of 251 1.59362549800797%	0.296508	1
Choline metabolism in cancer	ko05231	1 out of 21 4.76190476190476%	4 out of 251 1.59362549800797%	0.296508	1
Renin secretion	ko04924	1 out of 21 4.76190476190476%	4 out of 251 1.59362549800797%	0.296508	1
GABAergic synapse	ko04727	1 out of 21 4.76190476190476%	4 out of 251 1.59362549800797%	0.296508	1
HIF-1 signaling pathway	ko04066	1 out of 21 4.76190476190476%	5 out of 251 1.99203187250996%	0.356319	1
Proximal tubule bicarbonate reclamation	ko04964	1 out of 21 4.76190476190476%	5 out of 251 1.99203187250996%	0.356319	1
Ascorbate and aldarate metabolism	ko00053	1 out of 21 4.76190476190476%	5 out of 251 1.99203187250996%	0.356319	1
Citrate cycle (TCA cycle)	ko00020	1 out of 21 4.76190476190476%	5 out of 251 1.99203187250996%	0.356319	1
Fructose and mannose metabolism	ko00051	1 out of 21 4.76190476190476%	5 out of 251 1.99203187250996%	0.356319	1
Carbon metabolism	ko01200	2 out of 21 9.52380952380952%	15 out of 251 5.97609561752988%	0.362963	1
Taste transduction	ko04742	1 out of 21 4.76190476190476%	6 out of 251 2.39043824701195%	0.411267	1
Ferroptosis	ko04216	1 out of 21 4.76190476190476%	7 out of 251 2.78884462151394%	0.46173	1
Butanoate metabolism	ko00650	1 out of 21 4.76190476190476%	7 out of 251 2.78884462151394%	0.46173	1
Glucagon signaling pathway	ko04922	1 out of 21 4.76190476190476%	7 out of 251 2.78884462151394%	0.46173	1
Sulfur metabolism	ko00920	1 out of 21 4.76190476190476%	8 out of 251 3.18725099601594%	0.508057	1
Biosynthesis of unsaturated fatty acids	ko01040	1 out of 21 4.76190476190476%	9 out of 251 3.58565737051793%	0.55057	1
Histidine metabolism	ko00340	1 out of 21 4.76190476190476%	9 out of 251 3.58565737051793%	0.55057	1
Glyoxylate and dicarboxylate metabolism	ko00630	1 out of 21 4.76190476190476%	9 out of 251 3.58565737051793%	0.55057	1
cAMP signaling pathway	ko04024	1 out of 21 4.76190476190476%	9 out of 251 3.58565737051793%	0.55057	1
Lysine degradation	ko00310	1 out of 21 4.76190476190476%	10 out of 251 3.98406374501992%	0.58957	1
Arginine biosynthesis	ko00220	1 out of 21 4.76190476190476%	10 out of 251 3.98406374501992%	0.58957	1
Alanine, aspartate and glutamate metabolism	ko00250	1 out of 21 4.76190476190476%	12 out of 251 4.7808764940239%	0.658117	1
ABC transporters	ko02010	3 out of 21 14.2857142857143%	41 out of 251 16.3346613545817%	0.701674	1
Neuroactive ligand-receptor interaction	ko04080	1 out of 21 4.76190476190476%	14 out of 251 5.57768924302789%	0.715673	1
Tryptophan metabolism	ko00380	1 out of 21 4.76190476190476%	14 out of 251 5.57768924302789%	0.715673	1
2-Oxocarboxylic acid metabolism	ko01210	1 out of 21 4.76190476190476%	15 out of 251 5.97609561752988%	0.740866	1
Pyrimidine metabolism	ko00240	1 out of 21 4.76190476190476%	19 out of 251 7.56972111553785%	0.821951	1
Central carbon metabolism in cancer	ko05230	1 out of 21 4.76190476190476%	24 out of 251 9.56175298804781%	0.889688	1
Biosynthesis of cofactors	ko01240	2 out of 21 9.52380952380952%	42 out of 251 16.7330677290837%	0.898716	1
Metabolic pathways	ko01100	16 out of 21 76.1904761904762%	211 out of 251 84.0637450199203%	0.904947	1
Biosynthesis of amino acids	ko01230	1 out of 21 4.76190476190476%	36 out of 251 14.3426294820717%	0.966629	1

## Sheet: Table10
#Kegg_pathway	ko_id	Cluter_frequency	Genome_frequency	P-value	FDR
Arachidonic acid metabolism	ko00590	3 out of 29 10.3448275862069%	5 out of 251 1.99203187250996%	0.0119143	1
Ferroptosis	ko04216	3 out of 29 10.3448275862069%	7 out of 251 2.78884462151394%	0.0354409	1
Aldosterone synthesis and secretion	ko04925	2 out of 29 6.89655172413793%	4 out of 251 1.59362549800797%	0.0668575	1
Primary bile acid biosynthesis	ko00120	2 out of 29 6.89655172413793%	4 out of 251 1.59362549800797%	0.0668575	1
Serotonergic synapse	ko04726	2 out of 29 6.89655172413793%	4 out of 251 1.59362549800797%	0.0668575	1
Purine metabolism	ko00230	4 out of 29 13.7931034482759%	15 out of 251 5.97609561752988%	0.0795946	1
Bile secretion	ko04976	4 out of 29 13.7931034482759%	15 out of 251 5.97609561752988%	0.0795946	1
Regulation of lipolysis in adipocytes	ko04923	2 out of 29 6.89655172413793%	5 out of 251 1.99203187250996%	0.103486	1
PI3K-Akt signaling pathway	ko04151	1 out of 29 3.44827586206897%	1 out of 251 0.398406374501992%	0.115538	1
Olfactory transduction	ko04740	1 out of 29 3.44827586206897%	1 out of 251 0.398406374501992%	0.115538	1
Ovarian steroidogenesis	ko04913	1 out of 29 3.44827586206897%	1 out of 251 0.398406374501992%	0.115538	1
Leishmaniasis	ko05140	1 out of 29 3.44827586206897%	1 out of 251 0.398406374501992%	0.115538	1
Longevity regulating pathway	ko04211	1 out of 29 3.44827586206897%	1 out of 251 0.398406374501992%	0.115538	1
Platelet activation	ko04611	1 out of 29 3.44827586206897%	1 out of 251 0.398406374501992%	0.115538	1
Ether lipid metabolism	ko00565	1 out of 29 3.44827586206897%	1 out of 251 0.398406374501992%	0.115538	1
Inflammatory mediator regulation of TRP channels	ko04750	1 out of 29 3.44827586206897%	1 out of 251 0.398406374501992%	0.115538	1
Necroptosis	ko04217	1 out of 29 3.44827586206897%	1 out of 251 0.398406374501992%	0.115538	1
Oxytocin signaling pathway	ko04921	1 out of 29 3.44827586206897%	1 out of 251 0.398406374501992%	0.115538	1
Glycosylphosphatidylinositol (GPI)-anchor biosynthesis	ko00563	1 out of 29 3.44827586206897%	1 out of 251 0.398406374501992%	0.115538	1
Taurine and hypotaurine metabolism	ko00430	2 out of 29 6.89655172413793%	6 out of 251 2.39043824701195%	0.144247	1
Glycerophospholipid metabolism	ko00564	2 out of 29 6.89655172413793%	7 out of 251 2.78884462151394%	0.187769	1
Long-term depression	ko04730	1 out of 29 3.44827586206897%	2 out of 251 0.796812749003984%	0.218135	1
Morphine addiction	ko05032	1 out of 29 3.44827586206897%	2 out of 251 0.796812749003984%	0.218135	1
Sphingolipid metabolism	ko00600	1 out of 29 3.44827586206897%	2 out of 251 0.796812749003984%	0.218135	1
Cortisol synthesis and secretion	ko04927	1 out of 29 3.44827586206897%	2 out of 251 0.796812749003984%	0.218135	1
mTOR signaling pathway	ko04150	1 out of 29 3.44827586206897%	2 out of 251 0.796812749003984%	0.218135	1
Fc gamma R-mediated phagocytosis	ko04666	1 out of 29 3.44827586206897%	2 out of 251 0.796812749003984%	0.218135	1
Fc epsilon RI signaling pathway	ko04664	1 out of 29 3.44827586206897%	2 out of 251 0.796812749003984%	0.218135	1
Parathyroid hormone synthesis, secretion and action	ko04928	1 out of 29 3.44827586206897%	2 out of 251 0.796812749003984%	0.218135	1
Amoebiasis	ko05146	1 out of 29 3.44827586206897%	2 out of 251 0.796812749003984%	0.218135	1
Cushing syndrome	ko04934	1 out of 29 3.44827586206897%	2 out of 251 0.796812749003984%	0.218135	1
Cholesterol metabolism	ko04979	1 out of 29 3.44827586206897%	2 out of 251 0.796812749003984%	0.218135	1
GnRH signaling pathway	ko04912	1 out of 29 3.44827586206897%	2 out of 251 0.796812749003984%	0.218135	1
cGMP-PKG signaling pathway	ko04022	1 out of 29 3.44827586206897%	2 out of 251 0.796812749003984%	0.218135	1
Retrograde endocannabinoid signaling	ko04723	1 out of 29 3.44827586206897%	2 out of 251 0.796812749003984%	0.218135	1
Linoleic acid metabolism	ko00591	2 out of 29 6.89655172413793%	8 out of 251 3.18725099601594%	0.232927	1
Cysteine and methionine metabolism	ko00270	3 out of 29 10.3448275862069%	16 out of 251 6.37450199203187%	0.276859	1
Caffeine metabolism	ko00232	2 out of 29 6.89655172413793%	9 out of 251 3.58565737051793%	0.278801	1
D-Glutamine and D-glutamate metabolism	ko00471	1 out of 29 3.44827586206897%	3 out of 251 1.19521912350598%	0.309196	1
AMPK signaling pathway	ko04152	1 out of 29 3.44827586206897%	3 out of 251 1.19521912350598%	0.309196	1
Parkinson disease	ko05012	1 out of 29 3.44827586206897%	3 out of 251 1.19521912350598%	0.309196	1
FoxO signaling pathway	ko04068	1 out of 29 3.44827586206897%	3 out of 251 1.19521912350598%	0.309196	1
Antifolate resistance	ko01523	1 out of 29 3.44827586206897%	3 out of 251 1.19521912350598%	0.309196	1
Vascular smooth muscle contraction	ko04270	1 out of 29 3.44827586206897%	3 out of 251 1.19521912350598%	0.309196	1
Sphingolipid signaling pathway	ko04071	1 out of 29 3.44827586206897%	3 out of 251 1.19521912350598%	0.309196	1
Lysine degradation	ko00310	2 out of 29 6.89655172413793%	10 out of 251 3.98406374501992%	0.324652	1
Arginine and proline metabolism	ko00330	3 out of 29 10.3448275862069%	18 out of 251 7.17131474103586%	0.345428	1
Pathways of neurodegeneration - multiple diseases	ko05022	1 out of 29 3.44827586206897%	4 out of 251 1.59362549800797%	0.389975	1
GABAergic synapse	ko04727	1 out of 29 3.44827586206897%	4 out of 251 1.59362549800797%	0.389975	1
Renin secretion	ko04924	1 out of 29 3.44827586206897%	4 out of 251 1.59362549800797%	0.389975	1
Choline metabolism in cancer	ko05231	1 out of 29 3.44827586206897%	4 out of 251 1.59362549800797%	0.389975	1
Pentose and glucuronate interconversions	ko00040	1 out of 29 3.44827586206897%	4 out of 251 1.59362549800797%	0.389975	1
Thyroid hormone synthesis	ko04918	1 out of 29 3.44827586206897%	5 out of 251 1.99203187250996%	0.461598	1
HIF-1 signaling pathway	ko04066	1 out of 29 3.44827586206897%	5 out of 251 1.99203187250996%	0.461598	1
Citrate cycle (TCA cycle)	ko00020	1 out of 29 3.44827586206897%	5 out of 251 1.99203187250996%	0.461598	1
Fructose and mannose metabolism	ko00051	1 out of 29 3.44827586206897%	5 out of 251 1.99203187250996%	0.461598	1
Ascorbate and aldarate metabolism	ko00053	1 out of 29 3.44827586206897%	5 out of 251 1.99203187250996%	0.461598	1
Proximal tubule bicarbonate reclamation	ko04964	1 out of 29 3.44827586206897%	5 out of 251 1.99203187250996%	0.461598	1
Metabolic pathways	ko01100	25 out of 29 86.2068965517241%	211 out of 251 84.0637450199203%	0.493312	1
Taste transduction	ko04742	1 out of 29 3.44827586206897%	6 out of 251 2.39043824701195%	0.525068	1
ABC transporters	ko02010	5 out of 29 17.2413793103448%	41 out of 251 16.3346613545817%	0.531508	1
Glucagon signaling pathway	ko04922	1 out of 29 3.44827586206897%	7 out of 251 2.78884462151394%	0.581284	1
Diabetic cardiomyopathy	ko05415	1 out of 29 3.44827586206897%	7 out of 251 2.78884462151394%	0.581284	1
Butanoate metabolism	ko00650	1 out of 29 3.44827586206897%	7 out of 251 2.78884462151394%	0.581284	1
Sulfur metabolism	ko00920	1 out of 29 3.44827586206897%	8 out of 251 3.18725099601594%	0.63105	1
Histidine metabolism	ko00340	1 out of 29 3.44827586206897%	9 out of 251 3.58565737051793%	0.675081	1
cAMP signaling pathway	ko04024	1 out of 29 3.44827586206897%	9 out of 251 3.58565737051793%	0.675081	1
Glyoxylate and dicarboxylate metabolism	ko00630	1 out of 29 3.44827586206897%	9 out of 251 3.58565737051793%	0.675081	1
Biosynthesis of unsaturated fatty acids	ko01040	1 out of 29 3.44827586206897%	9 out of 251 3.58565737051793%	0.675081	1
Arginine biosynthesis	ko00220	1 out of 29 3.44827586206897%	10 out of 251 3.98406374501992%	0.714017	1
Alanine, aspartate and glutamate metabolism	ko00250	1 out of 29 3.44827586206897%	12 out of 251 4.7808764940239%	0.778828	1
Glutathione metabolism	ko00480	1 out of 29 3.44827586206897%	12 out of 251 4.7808764940239%	0.778828	1
Neuroactive ligand-receptor interaction	ko04080	1 out of 29 3.44827586206897%	14 out of 251 5.57768924302789%	0.829345	1
Tryptophan metabolism	ko00380	1 out of 29 3.44827586206897%	14 out of 251 5.57768924302789%	0.829345	1
2-Oxocarboxylic acid metabolism	ko01210	1 out of 29 3.44827586206897%	15 out of 251 5.97609561752988%	0.850226	1
Carbon metabolism	ko01200	1 out of 29 3.44827586206897%	15 out of 251 5.97609561752988%	0.850226	1
Tyrosine metabolism	ko00350	1 out of 29 3.44827586206897%	15 out of 251 5.97609561752988%	0.850226	1
Phenylalanine metabolism	ko00360	1 out of 29 3.44827586206897%	16 out of 251 6.37450199203187%	0.868631	1
Glycine, serine and threonine metabolism	ko00260	1 out of 29 3.44827586206897%	16 out of 251 6.37450199203187%	0.868631	1
Biosynthesis of cofactors	ko01240	3 out of 29 10.3448275862069%	42 out of 251 16.7330677290837%	0.899716	1
Pyrimidine metabolism	ko00240	1 out of 29 3.44827586206897%	19 out of 251 7.56972111553785%	0.911671	1
Protein digestion and absorption	ko04974	1 out of 29 3.44827586206897%	22 out of 251 8.76494023904382%	0.940936	1
Central carbon metabolism in cancer	ko05230	1 out of 29 3.44827586206897%	24 out of 251 9.56175298804781%	0.954977	1
Biosynthesis of amino acids	ko01230	1 out of 29 3.44827586206897%	36 out of 251 14.3426294820717%	0.991646	1

[truncated: 5 more sheets: Table11, Table12 , Table13, Table14, Table15]
